# Supplementary material for: Identification and expression profile analysis of odorant binding protein and chemosensory protein genes in Bemisia tabaci MED by head transcriptome
Source: PubMed Central journal article supplement (PMC5293548; doi:10.1371/journal.pone.0171739), 2017-02-06
Supplement: pone.0171739.s001.pdf [file pone.0171739.s001.pdf]

**S1 Table. PCR primers**

| Primer name | Sequence (5'-3')                           |
|-------------|--------------------------------------------|
| BtabOBP1    | Forward CGGGATCCATGATGGATCTCAAAGCTATTTTGC  |
|             | Reverse CCCTCGAGATTGAACCAGCCAAGCTCCC       |
| BtabOBP2    | Forward CGGGATCCATGGCAATGCGTGCGCT          |
|             | Reverse CCCTCGAGAGGTTTAGGCGGTGGGCTC        |
| BtabOBP3    | Forward CGGTGAGTGTTGTCTGTCTCGT             |
|             | Reverse GCTAGTGAATCTCCGTTGAG               |
| BtabOBP4    | Forward CGGGATCCATGAAATCTTTCATTGCTGTTTTAGC |
|             | Reverse CCCTCGAGAGCTTTGATGTAAAAGTTGCGCT    |
| BtabOBP5    | Forward GAGATGTCGTCCCTCCGTCC               |
|             | Reverse CCCACGTCCTCGATTTGGTA               |
| BtabOBP6    | Forward TTTACCTTTTTCTACCGTCC               |
|             | Reverse TGCGTAAGTTAAGTTGCCTC               |
| BtabOBP7    | Forward GTATGGGCGGAGGGGGTA                 |
|             | Reverse AGCTCATGCACTTGACTTCCTT             |
| BtabOBP8    | Forward TGTGTCCCAGGATATTCATT               |
|             | Reverse CTGTTGCTGATTTCCGGTTTA              |
| BtabCSP1    | Forward TAGTGACTTGTGAAGTGAAG               |
|             | Reverse GGCCTTTGGAAGGTTGGGAT               |
| BtabCSP2    | Forward GAGTGTTTTTCGATCCGGTGT              |
|             | Reverse CGAGTAGCTGGCTCATTTCG               |
| BtabCSP3    | Forward CGGTGGGTTTAGTTTATCCT               |
|             | Reverse TCTTCCTCGTGCTTCTCTT                |
| BtabCSP4    | Forward AGTGCGCATTCCGTCATTTCG              |
|             | Reverse GCTGCCACGGTGTCTT                   |
| BtabCSP5    | Forward AATGAGCAAGTACGTGTTTG               |
|             | Reverse GCTTTGGAATGGAGTAACG                |
| BtabCSP6    | Forward TGTAGACGCTCCCACGGTGT               |

|           |         |                      |
|-----------|---------|----------------------|
|           | Reverse | GAACGAACGGGTTTTCTGC  |
| BtabCSP7  | Forward | AACTTTCTCAGTAACTCCGC |
|           | Reverse | TGGGACATTCTGTTTCTTTA |
| BtabCSP8  | Forward | TCAACAATATGTCGAGGACA |
|           | Reverse | TCTGCCTGTAGACACCGTTT |
| BtabCSP9  | Forward | CATGTATTTGTTTTCCGTGG |
|           | Reverse | TGGTAACTTGTTTGGCTGCC |
| BtabCSP10 | Forward | GAGCATCAGTTAGCATTGGA |
|           | Reverse | ATCTACAGAGAGCCGAGGAA |
| BtabCSP11 | Forward | TTAGTTCCGTCCGCGTGAAA |
|           | Reverse | TTTTGACACTCAGACCGGGG |
| BtabCSP12 | Forward | GACCGGAGTCAACTGACGTT |
|           | Reverse | TCGACGCTTATTGCACAGGA |
| BtabCSP13 | Forward | GTCGGTGGAAATCTCGCGTT |
|           | Reverse | TTGAAACGGAAGGTGGGCAT |

---
