# Supplementary material for: Identification and expression profile analysis of odorant binding protein and chemosensory protein genes in Bemisia tabaci MED by head transcriptome
Source: PubMed Central journal article supplement (PMC5293548; doi:10.1371/journal.pone.0171739), 2017-02-06
Supplement: pone.0171739.s002.pdf [file pone.0171739.s002.pdf]

**S2 Table. RT-qPCR primers**

| Primer name | Sequence (5'-3') |                         |
|-------------|------------------|-------------------------|
| BtabOBP1    | Forward          | AAGTGCTTGACGGATTATTAC   |
|             | Reverse          | GCATCATATTATCGCAGTGT    |
| BtabOBP2    | Forward          | CTCTTATTGGTCTATTTCTCGTT |
|             | Reverse          | CTTCTTCTTCTGGCATTGG     |
| BtabOBP3    | Forward          | CTATCTCGGTTTCAGTTCCA    |
|             | Reverse          | TGTCTTTCCACTCGCTAT      |
| BtabOBP4    | Forward          | GTTTCTTGGAGTGC GTTTA    |
|             | Reverse          | TCATCATCATCAGCCTCTT     |
| BtabOBP5    | Forward          | AAGTAAAGGCTGTGGATGA     |
|             | Reverse          | CGAGTAATAGTTGTTGTCTTGA  |
| BtabOBP6    | Forward          | GTAGCAATACAGGTGGAGA     |
|             | Reverse          | ATGACACTCTTGACATTAGC    |
| BtabOBP7    | Forward          | TCGAATCAGATGCAGAGGGTG   |
|             | Reverse          | TATCCGGGGGACTCATTCCA    |
| BtabOBP8    | Forward          | TGATGGCGTGTCTTATGA      |
|             | Reverse          | CTGAGGTTGAGTGCTGTA      |
| BtabCSP1    | Forward          | GTCCTCTCGGCCGATACCTA    |
|             | Reverse          | AAGCGGTTTTCAAAGCGTCG    |
| BtabCSP2    | Forward          | AAGTTCTCGTGGTGTGTG      |
|             | Reverse          | GAGTAAGCAGGTGAGGTAG     |
| BtabCSP3    | Forward          | AGTGCGCCAAGTGTACTGAA    |
|             | Reverse          | ATTTGGCCTCCAATTCGCC     |
| BtabCSP4    | Forward          | TTCCAGACCTGACCGAAACG    |
|             | Reverse          | CTCTTGTTGTCCGGGTCGAA    |
| BtabCSP5    | Forward          | AAACGCCTCATCCGCAACTA    |
|             | Reverse          | CTTGGCGCATTCCGTTTTCA    |
| BtabCSP6    | Forward          | TGTTCCGAGAGCATAGTGCG    |
|             | Reverse          | GCATGCACTCGACAAGCATC    |
| BtabCSP7    | Forward          | CCGACGGCTTAAAACATT      |
|             | Reverse          | AGGACCTTCTGGATCTGT      |
| BtabCSP8    | Forward          | GACAGTAATCTTCTTGTGCTTA  |
|             | Reverse          | ATCGTTGTTTCAGAATCTCATC  |
| BtabCSP9    | Forward          | ACTACTTCAACTGCCTCAT     |
|             | Reverse          | CAATCTTCTTCTGTTTCTCTGT  |
| BtabCSP10   | Forward          | TTTGTCGGCAGTTTCATC      |
|             | Reverse          | GAGGAGCTTCTCGTTCTT      |
| BtabCSP11   | Forward          | GTCCTTGCACTAACGAGGGG    |
|             | Reverse          | AACTGTGCGCACTATCCTCC    |
| BtabCSP12   | Forward          | TTGGTGGAATCAAGGTGCGT    |
|             | Reverse          | GAGCTCTTGGTATTCCTCGG    |
| BtabCSP13   | Forward          | CGTGGACCGAGTTCTCAACA    |
|             | Reverse          | TTCTGCTTCTCCGTGCACTT    |

|                   |         |                      |
|-------------------|---------|----------------------|
| BtabActin         | Forward | TCTTCCAGCCATCCTTCTTG |
|                   | Reverse | CGGTGATTCCTTCTGCATT  |
| BtabEF-1 $\alpha$ | Forward | TAGCCTTGTGCCAATTCCG  |
|                   | Reverse | CCTTCAGCATTACCGTCC   |

---
