# Supplementary material for: Identification and expression profile analysis of odorant binding protein and chemosensory protein genes in Bemisia tabaci MED by head transcriptome
Source: PubMed Central journal article supplement (PMC5293548; doi:10.1371/journal.pone.0171739), 2017-02-06
Supplement: pone.0171739.s004.pdf [file pone.0171739.s004.pdf]

## S2 File. Sequences for MEME analysis

The MEME analysis of OBPs

>BtabOBP1

MMDLKAILLSLFVVTLVSLV GITHAVTHAEMDQLAVACNGQKADIDVMKQWR  
VPSSDSGKCLMKCLTDYYKMF DSEGKYS LKNTEDSLYKAWSEKPKHEMPIIA  
QHCDNMMRSAPKENLGSCQMSYDTMKCINEKAWELGWFN

>BtabOBP4

MKSFI AVLAVLFV FACVQAQDAKQKVA AVEKCKTEVHGGHDVLRIVGTSEL  
PKTEEQR CFLECVYKNLQLIVDDKFAEPGAKRLMMM KYGSNPDQLKIAQTEI  
ETCAKEVKPTAGMKCSLAHNIRQCFAKEGQKRNFYIKA

>BtabOBP6

MQGEVCFALLVVCLLHVTFIPDVETAVSEQMIKQMKDMHKKTCMARSQVKK  
EGLAKFMEEGVNDDPAFKKYTL CMLKNMQGSKNGKIAIKDIENQAKAMLP  
PLRDAILDATSKCSNTGGDTPEDITYNFSKCSHKANVKSVMII

>BtabOBP8

MNNLMVFSILLYLQYLLAVKADQGNQGHQGGQGNQSEDEKVKAIYQKQ  
QESMAEEKDLDNFKKMEMPSSEK GKCMMACLMREAKIIVNKRFSKDGAMA  
LAQRYYSTQPQNMDKAKQVIVACDKQVEHERNECNIAGKLAECVVTEAQRV  
GLTSVPKG

>ApisOBP1

MLNLKVMMLFLCLSVIVVYCESDQVPINSSAAVESCLLETNMTRDEFEDMLTSP  
NARELTILKSHAHKCMFGCVMRKNHIVNDGVVSKEVLSKYVLFYGRPDYK  
RRLIKDVEHIVDVC AKKVADESETDECELAATLVTCIVLEANKAGLVDDPAR  
QI

>ApisOBP2

MKVSAAATAVLVALVATVQSSDPCNISTCYKSGTTKPPMAVTPTHLPVQSSSTQT  
SHPQTTYAKDHVHGSTTTKSGVNATVTTASGASVNGTEPPAVVKSSAGVTGN  
STTPKPTMTEGHVALKQKLNTIAVKCKDELHAPQEIMALVSNTVVPQNEQQR  
CYLECVYKNLNLIKNNKFSVEDGKAMARIRFANQPEEHKKAVTIETCEKEAV  
IDPKTTEKCAAGR VIRNCFVKNGEKINFFPKA

>ApisOBP3

MISSTFYITLVFGIAMLISCGHGRFTTEQIDYYGKACNASEDDL VVVKSYKVPT  
TETGKCLMKCMITKLGLLNDDGSYNKTGMEAGLKKYWSEWSTEKIESINNK  
CYEEALLVSKEVVATCNYSYTVMACLNKQLDLDKST

>ApisOBP4

MRGNYSSMVFLFAIGFQDIFCQKQEPSGKCRAPDKAPLNLEIIIINTCQEEIKSA  
LLQEALDILNDGNVEQNTPNYSSRSKREAEEDLTNEERRVAGCLLQCVYKKV  
KAVDETGFVVDGLMKLYNEGVQDRNYIATLSAVRHCISIAQQLKQQQPSKS  
FDDGQTCDLAYEMFECVSEKIEENCGVENKSNN

>ApisOBP5

MSANSATIKCIAVAAILLQISVIFADAGHHRRGKELLDTEDSDFFRCKQASRKS  
CCGPENAMKRFGDKDKVA ADECYAQVAEKFATVTATTPKQDLFSAEAVKITK  
KKQFCLHECIGKKNLLTEDGSLNKTFIADYAMKSVFKEQWQKQVGGQKALD  
KCLEETYIPWPAEDKENVCNPVYVQFQHCLWLQYESNCPANKIKITKKCEKT

RNRYRMQKSTSN

>ApisOBP6

MPNILPNLDSTWEKCFETFKQFKDKPETKEYKEMAHGKEPPCLFQCIFMQSGL  
TTSDGKLNEDAITKKMSEGINNDEKWKSIWQNSLNKCFDDVKQEDKKQILIM  
NTPAGRLMKCFLRDMYMSCPKNVWVESSECLNMKDLVQKCPEMPPPVPKSP  
PKLI

>ApisOBP7

MVARCRMYNMLPTTVLFAIIAATVLKDCDAYLSEAAIKKTQQMLKTVCSKHH  
SVEEDVFTNIKKGIFPEDNNNIKCYFACNFKTMQLINQKGVIDKKMFKDKMS  
MMAPPNVYKILLPVIEQCTGKDKGEELCQSSYNVIKCAHSVDPKSLEFLPL

>ApisOBP8

MFALKVACLCLSVAVVFGENNQQNGPSDRSATIFQSCIAETKLSGDALKGFRS  
MSIPKTQAEKMMGCLMRKVNINKGKFSVEEATKVAQKYGTNEAMMKK  
AKDLIDVCAKKAQSTTEECALAGIVTTCIVEEAQKAGLSGGPGSRSRRTVSPK  
FRRDAM

>ApisOBP9

MIKKTLLLSVFVLFGCLFSINKADDADAKDKELMSKLFTVVFKCFKDADWG  
TCGEMITTKYDITQAKYKQCTCHMACAGEELGMINASGQPEPAKFLEYVNKI  
NNPDIKSQLQLIYDKCQNVKGSEKCDLAEQFAICAFKESPALKERVSTLMEML  
VKMKPKSK

>ApisOBP10

MEHLRSTNVVFAIVMALLVVQSSTRPQPDEMEEIKRTLYNACAGKFPITEEIKN  
NAKNSIISDDPTFKCFLKCCFDEMSMIDEDGIIDGDSLKAMAPDHIKPILEQVIP  
SCTKNVKQDGCEASFEFISCGIKLNPLIVALLPL

>ApisOBP11

MSSSTFYITLLFGIAMLISCGYGIFTTEQIDYYGKACNASEDDLIVLKSYPST  
ETGKCLMKCMITKLGLLNDGSGYNKTGMEAGLKKYWSEWATEKIETINEKC  
YEEGNTATLLYHVAIYFTCVSGDYSDVQLLIHCDGMFEQEVGSRQVNLKLLIM  
LKIGLSEPKR

>ApisOBP12

DDLVVVKSYPVPTTETGKCLMKCMITKLGLLNDGSGYNKTGMEAGLKKYW  
SEWSTEKIESINNKCYEEGDTSTLLYHVVIYFTCVKGGSSDVQLLVHCDGMFE  
QAVGSRQVNL

>AlinOBP1

MNSLIPVLLVCAAATRADEQTNAMVAKAFNKCREEFPISDDEIGGVREKTTI  
PESHNAKCLMACMLREGKMLRDGKYEKENALIMADVLNKDDPASADKAKQ  
LVETCAGKVGTDAGGDECEFAVKMAVCAEEAKKLGVRPPDF

>AlinOBP2

MSLKIQFFVFAAICAACVCAYQEQLKQTIRDCQDGKEVTDDDELEEFTKPLIPR  
NREEKCIACVMRTYNIISNGHYDPKIAFGILKGILKDHPEKLNKIKEVMDHC  
GEDVPSHMDDECDLAGEIMQCEVKYQKAMGMA

>AlinOBP3

MDIRFGFIIACLAILSVANAIKEYSARMIAAKEKQCQKEFNVTDSVVEDFMKR  
NIKPEKSGKCMVHCIMEEMGMIDDHKINTEQVKLGNKEKWDDPALVELAN

QVADTCDQEVFTEGRCKCLVAVEYMMCLATHGDEVGLPHVDFEDSQDS

>AlinOBP4

MRIFVIFTAALTCVMAGELPEEMKEMAQGLHDSCVEETGVDNGLIAPCAKGN  
FADDAKLRCYFKCVFGNLGVISDEGELDAEAFGSILPDSMQELLPTIKSCGGT  
GSDPCDLAMNFNKCLQKADPVNFLVI

>AlinOBP5

MVLKMNLLLVVLVMSQVFFSVTEAAMSQAQMKQAMKTVRNMCIKPSGVDK  
EALAKMVNGEFDESQKLCYLGCVLGMMQAVKNNKINLTMVRNQITKML  
APERGQRILAAFESCATVTGDDNCGLAFRFAKCIYDTDKEAFIVP

>AlinOBP6

MGFKFVKYRSYFFVLVIRIILCIQIKAKELTDEQKEQIFAEIKNCMESTKLTDEEF  
ESIMAKKELPTSIEGKCFTKCLMEKMEYLEEGGKINVIQVQAGMEENMEKESE  
ITKAKEVIQQCADSVPPEDSCEYAYGISQCMYNKMKEAGISGS

>AlinOBP7

MNRPLLLLTAVLTVGSGQQEDCKTAPAGWPRRPPQCCDLFPLEGMKKEFGSC  
IRQIGNRQSSAVPTAQAVRDARLCIEECVYKGLGFMDEHKLNDQLEQLKK  
GIADKKDWTKPMEGAVKRCHETITKRETPQEAACQDSAHEFTHCAMRELFLN  
CPASEWNNNDECNLVKSARMQACPNIPPPPPPPQGFGRGQGGPPPQ

>AlinOBP8

MDTHFGLLIASLAILHTANAVINKDYLEKVVTAKDCKLKEFNVDDSVVEDFIV  
KYNKPQSESGKCMVACFMEERGMMKDGKTITEQVMLDNQEKWIAATHVNM  
GKEVIDTCDKEVPNEENDKCDLAVDYMMCLVKRGDEAGLPKMDVAQLKH

>AlinOBP9

MMELWKWRLALIIFGLVSCIQQTEGSQRTKQQPKSKTKESVVGATRPRDAKA  
TECVNKVNANEEESASFFRKEIPETEAGKCLLACYLEGKGLIVGGKISSGAAR  
VAARAYPNNRVKTGNVKHILSHCGTIAGRESNNCEMAYKLADCTTTLSDKFR  
L

>AlinOBP10

MFFNSVFLLVVCVSSYVTKGQELPPPQDVKNKTVVFKNSFLRSAKYCSSIYET  
STLAIMALLMSEKSDQNGKCFNLQRYRLMSQDGSYNKDKFKPFLEYIP  
DSKFLQSIRGNLKNCISEKDPDPCEKASKFIKCFYTRARNKGEIGASKEVIPAD  
GF

>AlinOBP11

MKTFVGLIFAVALVEFASASISKEYHDKAIEAKNTCAKLHNVDDETIMTYWKN  
HQLPEKEPETCIVICYLKEMKLVVDGKVDADAWKASNKEKWDDEKHVAAA  
DEIVDKCSAEVPPTENECEWGLALTKCALKHGKEAGIPPPDMEHPKRR

>AlinOBP12

MTTKLRSIGLVFIVSISYAFAYQELLKETIKKCQNGRDVTDDEVEEFTKPLVPK  
NEEERCLVACVFKEYKVIIDGHFDPVNALNVAKVVYKDYDPKVERIKDVLDH  
CGEDIPTHNDNECDLAGDIMKEVKYLNVPKMTSLEFLAGSMAATAEP

>AlinOBP13

MNISTRMISLTMAYLAAALVSGHRALDGILPQANQDECREESNFRGELNDDV  
GRNVTQELKCFAACSLMKLGIMNEKDGTVMTRLDDELIAHTPGKDAADV  
KTTVVEPCMKEVKKSTDYCEYSYQLIACGMSKVP

>AlinOBP14

MKPPGPPGSGTPPTAEERAARKIAHECADECLYKSSNLLTSAGELDKDAIKAL  
VTKLYTGDWATAATTAIDKCLASAKGEVEATSKCKSGSFQLSRCFMRSMFLGC  
PASSWTESTECAAAKARLTKCPNAMAPMPHKK

>AlinOBP15

MVDHWCASRIHKRYHELTHSRVVGGLRCCDEDEQTNAMVAKAFNKCREEFP  
ISDDEIGGVREKTTIPESHNAKCLMACMLREGKMLRDGKYEKENALIMADV  
LNKDDPASADKAKQLVETCAGKVGTDAGGDECEFAVKMAVCAAEAKKLG  
VRPPDF

>AlinOBP17

VKEIVQNVSKKCAAETKASPEQAKIILTQNIPKNDVERCYLQCVYSGVGV  
IKDGKFSQEGGNKLVAMRFHDAKEKELAKQLINTCAKEIKAKDGEKCS  
LGGKIRQCFVAHGKEVNFPPHA

>AsutOBP1

MNSLIPVLLVCAAAATRADEQTNAMVAKAFNKCREEFPISDDEIGGVREK  
TTIPESHNAKCLMACMLREGKMLRDGKYEKENALIMADVLNKDDPASAD  
KAKQLVETCAGKVGTDAGGDECEFAVKMAVCAAEAKKLGVRPPDF

>AsutOBP2

MSLKIQFFVFAAICAACVCAYQEQLKQTIRDCQDGKEVTDDLEEF  
TKPLIPKNREEKCMACVMRTYNIISNGHYDPKIAFGILKILKDHPEK  
LNKIKEVMDHCGEDVPSHMDDECDLAGEIMQCEVKYQKAMGMA

>AsutOBP3

MATNAKAVLFLALCGIVYVSAYQEVKATISDCKGGKEVSQEELDEFI  
KPLIPQTREEKCLMACVFTAYNVIVEGHFDPKLAGVAKNILHENPEK  
LKHKETLDYCGHEIPTKMDDECELAASEVMACRNKYNKDHGYDQDP

>AsutOBP4

MRIFVIFTAALTCVMAGELPEEMKEMAQGLHDSCVEETGVDNGLIAP  
CAKGNFADDAKLRCYFKCVFGNLGVISDEGELDAEAFGSILPDSMQE  
LLPTIKSCGGTGSDPCDLAMNFKCLQKADPVNFMVI

>AsutOBP5

MGHIPMSSDMTNILLLLVIGAGIAVNEGDAASMEALMECKKDFKVS  
REQIMSGDSSEEVKCFAECLMKTGGMDEGGNFNTEKIKEEGRKHAK  
TDDQKRAHDAAVDKCISETEAANPTGKCEKGFEEFKCVRGEMKSLM

>AsutOBP6

MGFKFVKYRSYFFVLVIHILCIQIKAKELTDEQKEQIFAEIKNCME  
STKLTDEEFESIMAKKELPTSKEGKCFTKCLMEKMEYLEEGGKIN  
VIAVQAGLEENMEKESEITKAKEIIQQCADTVPPEDSCEYAYGISQ  
CMYTKMKEAGISGGP

>AsutOBP7

MNRPLLLLTAULTVVGSGQQEDCKTAPAGWPRRPPQCCDLFPLEGM  
KKEFGSCIRQIGNRQSSAVPTAQAVRDARLCIEECVYKGLGFMDEH  
KLNKDQLLEQLKKGIAADKDWTKPMEGAVKKCHETITKRETPQEA  
ACQDSAHEFTHCVMRELFLNCPASEWNNNDECNLVKS  
RMQACPNIPPPPPPPPPQGFRGQGGPPPQ

>AsutOBP8

MKLALVTAFLSAIVLAEGNINKEYLDKLIAAKEKCVKEFSVDD  
SIVEDLYVRY

NKPPTESGKCMVACYMEERGMMKDGKTITEQVMLDNQEKWIAATHVNMGK  
EVIDTCDKEVPNEENDKCDLAVDYMMCLVKRGDEAGLPKMDVAQLKH

>AsutOBP9

MMELWKWRLALIIFGLVSCIQQTEGSQRTKQQPKSKTKENVVVGATRPRDAKA  
TECVNQVKANEEESASFFRKEIPETEAGKCLLACYLEGKGLIVGGKISSSGAA  
RLAARAYPNNRVKTGNVKHILSHCGTIAGRESNNCEMAYKLADCTTTLSDFK  
KL

>AsutOBP10

MFFNSVFLVVCVSSYVTKGQELPPPQDVKNKTVVFKNSFLRSACYCSSIYET  
STLAIMALLMSEKSDQNGKCFNLQRYRLMSQDGSYNKDKFKPFLEYIP  
DSKFLQSIRGNLKNKISEKDPDPCEKASKFVKCFYTRARNKGEIGASKEVIPAD  
GF

>AsutOBP11

MKTFVGLIFAVALVEFASAVSKEYHDKAIAAKNTCAKLHNVDDETIMKFWKA  
HQLPEKEPETCIICYMKEMKLVVDGKVDADAWKASNKEKWDDEKHVAAAD  
EIVDKCSAEVPTTENECEWGLALTKCALKHGKEAGIPPPDMEHPKRR

>AsutOBP12

MFQAFVYQELLKETIKKCQNGRDVTDDEVEEFTKPLVPKNEEERCLVACVFK  
EYKVIIDGHFDPVNALNVAKVVYKDYDPKVERIKDVLHDHCGEDIPSHNDNEC  
DLAGDIMKCEVKYLNSIPKMTSLEFLAGSMAATAEP

>AsutOBP31

MGRLLTKTQNADLLIHPAGKIRVGVLPFLVGGIQDVIPCHDEARLKKPSGRHG  
GGGSPSAEDMAAHLRAHECADECVLKSQNLLTTDGELNKDAIKAQVVKST  
GDWAKLASDTADKCLASAKGEVTATATCKSGAGQFIYCFRRNLFLQCPSSSW  
TETTDCAAARITKCPNAKIPMGHHRH

>AsutOBP32

MDVMILPVFLIVFIAATASPAVLSAECQRFKEMRPLSSCCTVEMNPNSSYNY  
TEGDPIINKCFGDFNSSATRPTGPPSGYDCELECLMIEFGYMGKDKTINKDKIV  
KSIEDEYSADFQEAGHKAIEICMGRKYHTSCPSGIDGMIECFVQMMMLNCPAK  
HWSGGEDCKETKQLIDKCGEVLISIFADYDTD

>AglyOBP2

mkvsaatavlvalvatvqssdpcnistcyksgttkpttvtprlpvqssstptshqqttyakdhvhsstatksgvnttatt  
sgasvngterttvkvsssgvagnvttpkptmtdghlalkqklniavkckdelhapqeimalvsntvvpqneqqrcyle  
cvyknlnliknnkfsvddgkamakirfanqpeehkkavtiieckeaiidpkttekcaagrvmrcfvkngekinffp  
ka

>AglyOBP3

misstfytslmfgivmliscsfgrfteqidhygkacnateddlvvvksykvptsdtgkclmckmisklgllnddgsyn  
ktgmeaglkkywsewstdtiesinnkcyeeallvskdiiatcnayvmaclnkqldldkst

>AglyOBP5

mkrfgdkdkvaadecyaqvaekfatvtattpkqdlfsgeavkitkkkqfclhecigkknklltedgslnkftiadyamk  
svfkeqwqkqigqkaldkcleetyipwpaetenkcnpyvqfqlwleyesncpdnkiklkkcektrnryrmq  
kstsn

>AglyOBP6

mqqvvlcfiaicqtvftvgfertwilrqkrvtnddectrlipssekklpccqmpnilpgldnawevcfekfkqfkd

hatkeykemahgneppclfqcvfmqsglttsdgvnedavikkmaegmdndekwksiwrntfnkclndvkqed  
keqikmntnptgrlmkcfldlymnrpknvwvessecsnlkdlvekcpcmpppvfkspkli

>AglyOBP7

mvarkrmymlpatvllavvaatilkdsdaylseeaikkqkmlknvcskkhsveevftdikkgifpennnnikcyfa  
cnfrtmqmvnqkgildkkmfkdkmtmlappnvlailppieqcigndkdeicrssynfikcahrvdpkfleflpl

>AglyOBP8

mfafkvaclslvavvfgennqnsndrsasifqscisetklsgdalkgfrsmsipktqaekcmmgclmrkvvinn  
gkfsveeatkvaqyygtnetmmkkakdlidvcakkaqstteecalagivttciveaqkagltggpgsrskrvtspkf  
rhsiv

>AglyOBP9

miikktllvsgfvlfgcmfsinkaaddadadkelmsklitvafkcfkdadwgtcgemittkyditqakykqctchma  
cagedlglinsngqepakfleyvkrinnsviksqlqhiydkcqnvkgtেকcdlaeqfaicafkespemkervtklie  
mlvkmkpksk

>AglyOBP10

mehlrgrtnvfvaivmallvvqsstrpqpdelddikktlynacsekfplteeiknnvksividdqnfkcfllrccfdemsl  
idedgiidgeslaamavdkikpvaekivhdclpagkqekqdgeasfkffscgiklnpltiellplq

>AglyOBP11

misstfytsllfgiamliscsfgrfteqidhygkacnateddlvivksykvptsdtgkclmkmisklglnddgsynkt  
meaglkkywsewstdtiesinnkcyeeegticfilnrfvt

>AgosOBP2

MK VSAATAVLVALVATVQSSDPCNISTCYKSGTTKPPTTVTPTRLPVQSSSTPTS  
HQQTTYAKDHVHSSSTATKSGVNTTATTTSGASVNGTERTTVVKSSSGVAGNV  
TTPKPTMTDGHVALKQKLNTIAVKCKDELHAPQEIMALVSNTVVPQNEQQRC  
YLECVYKNLNLIKNNKFSVDDGKAMAKIRFANQPEEHKKAVTIETCEKEAIIID  
PKTTEKCAAGR VIRNCFVKNGEKINFFPKA

>AgosOBP3

MISSTFYTSLMFGIAMLISCSFGRFTTEQIDHYGKACNATEDDLVIVKSYKVPT  
SDTGKCLMKCMISKLGLLNDDGSYNKTGMEAGLKKYWSEWSTDIESINNK  
CYEEALLVSKDIIATCNAYVVMACLNKQLKLDNST

>AgosOBP4

MRGNYSLVVFLFGFGLLEIYCQKQELSGKCRAPDKAPLNLEIINICQEEIKSA  
LLQEALDILNDGTLEQNTPSYSRSKRDADEDLSNEERRVAGCLLQCVYKKVK  
AVDETGFPVVDGLMKLYNEGVDQDRNYMATLSAVRHCSIAQQLKQQQPSKS  
FDDGQTCDLAYEMFECVSEKIEENCGVENKLNLSQRQV

>AgosOBP5

MKMSANGATMKCVAVAVVLFQMSVIFAEAGHQRRGKELLDTEDSDFFRCKQ  
ASRKSCCPENAMKRFGDKDKVAADecYAQVAEKFATVTATTPKQDLFSGEA  
VKITKKKQFCLHECIGKKNKLLTEDGSLNKTFIADYAMKSVFKEQWQKIGQ  
KALDKCLEETYIPWPAEETENKCNPVYVQFQHCLWLEYESNCPDNKIKLTKK  
CEKTRNRYRMQKSPSNQ

>AgosOBP6

MQKVVFLCIFAICQTVFTVGFERTWILRQKRMTNDNECRALFPSPEKKLPTCC  
QMPNILPGLDNAWEVCFEKFKQFKDKHATKEYKEMVHENEPCLFQCVMQ  
SGLTTSDGKVNEDAVIKKMAEGMDNDEKWKSIWRNTFNKCLNDVKQEDKE

QIKVMNPTGRLMKCFLRDLYMNCPKNVVWVENSECSNLKDLVEKCPKLPPP  
VFQSPPKLI

>AgosOBP7

MNMLPATVLLAVVAATILKDSDAYLSEEAIKKTQKMLKNVCSKKHSVEEEVF  
TDIKKGIFPENNNNIKCYFACNFKTMQMVNQKGLDKKMFKDKMTMLAPPN  
VLAILLPPIEQCIGNDKDTEICQSSYNFIKCAHRVDPKSLEFLPL

>AgosOBP8

MFAFKVACLCLSVAVVFGENNQNSNDRSASIFQSCISETKLSGDALKGFRSM  
SIPKTQAEKCMMGCLMRKVNINKGKFSVEEATKVAQKYGTNESMMKKA  
KDLIDVCAKKAQSTTEECALAGIVTTCIVEEAQKAGLTGGPGSRSKRTVSPKF  
RHSIV

>AgosOBP9

MIKKTLLVSGFVLFMFSINKAADDADTADKELMSKLITVAFKCFKDADW  
GTCGEMITTKYDITQAKYKQCTCHMACAGEDLGLINSNGQPEPAKFLEYVKR  
INNSVIKSQLQHIYDKCQNVKGTEKCDLAEQFAICAFKESPEMKERVTKLIEML  
VKMKPKSK

>AlucOBP1

MKSFVGLIFAVALVEFASAITKEYHDMRAAAKDAKCLKKHPSIKESDVQEFLKK  
HKLPEPDDGKCMACIACMEEMNLMADGKINVEEAKKTNSDKYDGEKPNKEL  
ADKLDHCSSQVSPDGMSKCEYAYQISKCGLEYGMKNGLTTPPKMYEEQRR

>AlucOBP2

MTYHVFFRKFDFLPRISRRVRQCYHVSVPRLSGSSRRMLEETSQHHPKRRSRV  
SEKHLPEPDDGECMIACIACMEEMNLMADGKINVEEAQKTNSDKYDGEKPNKEL  
QLAEKLDHCSSQVSPDGMSKCEYAYQFSKCGLEYGMKNGLTTPPKMYEEQRR

>AlucOBP3

MKTFVGLIFAVALVEFASAVSKEYHDKAIAAKNTCAKLNVDDETIMKFWKA  
HQLPEKEPETCIICYMKEMKLVVDGKVDADAWKASNKEKWDDEKHVAAD  
EIVDKCSAEVPPTECEWGLALTKCALKHGKEAGIPPPDMEHPKRR

>AlucOBP4

MDTHFGLLIASLAILHTANAVINKDYLEKVVTAKDCLKEFNVDSDVDFIV  
RYNKPQSESGKCMVACIACMEEMNLMADGKINVEEAQKTNSDKYDGEKPNKEL  
GKEVIDTCDKEVPNEKNDKCDLAVDYMMCLVCRGDEAGLPKMDVAQLKH

>AlucOBP5

MNSIIVLCLVASAVTSLQGNPTTPNPSTSHVSSSAGITVSGVSKSPEEIKLKIKEQ  
VATLTGACKTQTKLTGEQAKIVASQAIPKTEAEKCFLECIYQGLQLTKDGFNE  
PAARAWAQKRFGNAPEDLQKANTMIDICVKEVVVKDENEKCALGRLIRECFV  
KNGAKINFFPKP

>AlucOBP6

MYDRFKLFALLALVVSCKSAPPEEPAECKLPESDSAELVKCKLNVLDEMA  
DSVGECKMLVKGKPEKGPVPEGFDCMDTCVFSKLGFAANNKLDKAEKLTCK  
FSELFKGDWSALSSTLKKCLPMAEGAKGSCASGADVFKFCIVRELYMNCPA  
SSWTKSDLCKANVERLEKCPHSMPLPGTGIIKN

>AlucOBP7

MNPLILILLVFAAATRGEEQANALVAKAFNKCFCGFEPLGDDEMKEVKDKST

VPSSHNAKCLMACMLKEGRILRGGKYELENAILMADVLNKNDHAATDKAK  
QLIETCAAQVGTDADECEFAFKMALCASDEAKKLGVRPPDF

>AlucOBP8

MVLKMKQILVVFVALQVLISTTEAVMTQAQMKQAMKTVRNMCIKPSGVDKE  
ALAKMVEGEFDESQKLCYLGCVLGMMAVAVKNNKINLTMVKNQISKMLA  
PEQQQRILAAFEGCATVTGDDNCDLAFKFAKCIYDTDKELLFQAFIVP

>AlucOBP9

MKSFVGLIFAVALVEFASAITKEYHDRAVAAKDAKCLKKHPSIKESDVQEFLKK  
HKLPEPDDGKCMACIACIYMEEMNLMDGKINVEEAKKTNSDKYDGEPPDNKEL  
ADKLDHCCSSQVSPDGMSKCEYAYQISKCGLEYGMKNGLTPPKMYEEQRR

>AlucOBP10

MTYHVFFRKFDFLPRISRRVRQCYHVSVPRSLSGSSRRMLEETSQHHPKRRSRV  
SEKHKLPEPDDGECMIACIYMEEKNLMDGKINVEANQTNQNSDKYDGEPPDNK  
QLAEKLDHCCSSQVSPDGMSKCEYAYQFSKCGLEYGMKNGLTPPKMYEEQRR

>AlucOBP12

MTCSHFIALLSVVALSLSSGEINEECKDIENLKTQLENFYGCCDFESMIERVVR  
TEEEVETDRFCREERKKINSTDGKVLASEGHDCFMCEVLKRMGAMGQDFK  
FIREKLDFFFLRGYPPEVKQAGKLAFLDKCLSKNFSKKYCASGINGLMMCLPE  
ELVMNCPANIWSSHESCPIAKEAIKKCPSYRVMIEQE

>AlucOBP13

MKHSSCVVPVALTIFVVAIVSGFKELDDVLPKPKQDECRKESNFQAELPSDINQ  
NITQELKCFACSLVKLGLMNEKDGITINMAQLEDLIAKHTGGKDAADMFKH  
TVVEPCMKEVNKTDDYCEYSFQLVKCGMSKVKPPSTGTEG

>AlucOBP14

MALNAKAVLLLGVCGLVYVSAYQEVKATLKDCKGGKEITQEEVDEFMKPLI  
PKNEEERCLMACVFRAYNVVDGHFDPKLAYGVAKNILHENPEKPKHIKETLD  
YCGHEIPTKMDNECDLAGEVMSCRNKYNIDHGYDQDP

>AlucOBP15

MMRPTAYYLFASYAALLVCVHFASVSAITPELDKRAKAAVAKCADVPRTDEA  
KKEDCHAGCFMSAMGYMTNGEINVKNMEEANKQKWDDQEIIKKGIQVDTT  
CAKQVGDTKGKSECTIGYEFSTCKKELVKKVGLPPPTPLKE

>AlucOBP16

MKRLVFLFTLCSLQWVSGITDELKQKAQAARLTCKQQVGLSDKEFNDWVK  
GIALPTTDGGTCCEVCACWMRELGYLTGGRVNLENMKAVNAQKWNNLAYV  
ELGNKIDALCSDRVLQTGRKECEIAVDFRKCKTELIQQFGGPPKPGST

>AlucOBP17

MRILVLFATAALTCVLAGELPEEMREMAQGLHDSCVGETGVDNGLIAPCAKGS  
FADDPKLCYFKCVFGNLGVISDDGELDAEAFASILPDNMQALLPTIRGCGST  
TGADPCDLAMNFKCLQKADPVNFMVI

>AlucOBP18

MHAAIVLIGSALLVAYVSGAPSANVKEIVQNVSKKCAAETKASPDQAKIVLSK  
NIPKDDAERCFLQCVYTGVGVIKDGKFSEEGGKLVLRFHDAKEKELANKL  
IATCAKEIKAKDGEKCSLGRAVRECFVNHGKQVNFPSA

>AlucOBP19



MNSRFGIVFASLALLHITNAGNIKEGYVAKIAEIKDKCLKEHNVDHSVVEDLL  
KKSIPKPEVKAQAQCMVACFFEENGMMKDGKIVSEMVKSNNAHQYEDPADVEK  
ANEASDMCDGEVSTDGKDKCLLAADYALCWVVKRTEEAGLPQIDFANSS

>AlucOBP20

MYTFKTFVLTSLASYVIAAPPADEPAECKPMKEKEEEEISKCKLEPVTVKEQA  
AFVDCMKLVKDTDKKGGPKPEGFECLDDCILSKTGSLSGSDKKIDPAKINAAK  
TTYTGDWAEPGAKMVEKCLAQVAENKDKTVCSTSGADVYTKCIFRESYINCP  
EKSWTNSDACKANKERVIKCPKTLPYNAEQHKAETR

>AlucOBP21

MKFFVVSAAVLVLA AVKANNEKANEKVTEIFNKCKETWPVTDDEIEQVKQ  
KQSIPDSKNVKCILACMLKEAKILRDGEYNKDNAELMADVLYKDEPEHAES  
KQIEMCSSELGKTEGDDCEYAYKMSVCASKHAKELGVKTPEF

>AlucOBP22

MSLKIHFVFAAIGAACVCAYQDQLKQTIKDCQGGKEVTDEELEEFTKPLIPK  
NEEERCIMACVMRTYNIINNGHYDPKIAFGIIGILKDHPEKLDRIKEVMDHCG  
EDVPQHMDNECDLAGEIMQCEVKYQKAMGLN

>AlucOBP24

MSTKLRSVGMILAIATHVCAYQEQLKETIKQCQDGREVTDDEVEEFTKPLVP  
KNQEERCLVACVFKEYKVIIDGHFDPVNALNVAKMVYKDYPEKWKRIKDV  
HCGEDIPTHNDNECDLAGDIMNCEVKYLNSMPKGVSELLAGSIAATAEP

>AlucOBP26

MNPTVAIIFTLVAYVKANTKELSPSEALKQKVKVQCQEVKATPEQLKIYDN  
FKDVPKDDVENCLMECMYTKTGGIGADGKYSVEGFKLVDMKYKGEENTK  
ARKIAADCEAKAAPKEGEKCSMGRAIRECLAATKENEFTI

>AlucOBP27

MARKFIKSCYTLVALLVFGSIHVEAKELTEEQRTQLFEDLKQCKNSTDLSD  
EFETIIAKKELPTSEAGKCFTKCLMEKLDIIEDAEGGKKKISVITMQASLEEN  
EKEDDIAKGDIIQKCGDTPEDSCAYAYNISKCIYDRMKEAGISQ

>AlucOBP28

MIIEICVLTVGISPHFIEGQELPPPGVGNKTAVFKESFIRTAKYCSSIHETSTVA  
VLAILMSEESDDQNGKCFNLMLQRYQLMSKQGAYNKDKFKPFLDYIPESRF  
LQSIKGNLKTCTERDPAPCEKAYKFIKCFYTRARNKDEFGKIQRK

>AlucOBP29

MNRPLLLLTAVLAVGSGQEDCKTAPAGWPRRPPQCCDLFPLEGMKKEFGS  
CIRQIGNRQSSAVPTAQAVRDARLCIEECVYKGLGFMEEHNLNKDQILQQLTK  
GVADKKDWTKPMEDAVKSCHEITKRETPQEGTCKDSAHEFTHCVMRQLFLS  
CPASEWNNNDECNLVKSVMQACPNIPPPPPPPQGFRRGQGGPPPPQ

>AlucOBP30

MNAHIVLCLVASVFALSQGTPTTPATSRRTVAPEDLEQAKSLRKFKCTAKTG  
FTGITTETSKGKDQARTATTPRPKTQLEKCYLECLYTGQLTKDQKGFNEPGA  
RALANKRYKNAPEELRKVNSIIDFCITEVVVRDIEEMCALGRLIKECFSKYGA  
KNFPEL

>AlucOBP31

MFTSATFTVFLFAVTLTRGQIDEDPECRPSGPPGKEPECCTIPMKLFGDEVQEA

VVKNCFDEAGMKRPSGPHGGGSPPTAEEMAAHISAHECADECVFKSGNFIKS  
DGGLDEDAIKAVIAKLFTGDWAPIATAAVNKCLASAKSGVSASAKCKSGAYQ  
LSKCFQRELFLGCPASLWTESTDCSAIKARITKCPNAKVPIGHHKH

>AlucOBP32

MSGRHSLILVLLAAVTSAEVLTDGDCPKTMPKEMKPLYKCCVVEMDSNKTIS  
DDQKAAVDSCVNTSKSDSDANKHDCMIECIFIKLGYMGEDKTINVDYVLKEM  
NSLLPEDFHEQTSKSLATCMGKKFSSTECPSEIDGVMACFSTMVLMNCPAKH  
WTDDEECKATRKFQKCGDSIGYRYD

>AlucOBP33

MHPWKTTCLIGMTAALMVVTAFAGLPFQNEMAVMQCKVKFDVTAEDIQLLK  
DSKLPSHSGKMMACILKKMKVMTKRGQFDLRNVQKWLNRNKYQGDQAN  
LAKGNYVAEACANTLPTLGIQDECEMAAEIMTCVRTKSKLVKKTLNGELPKE  
VSP

>AlucOBP34

MEHWKWRLALLIFGMVTCVPQLEGAQKSKQPSKAKTKESQVVAARPKDAR  
AAACVTQIGPDEEEEEASFYRKEIPETDKGKCLLACYLESKGVLSGGKFSSGA  
AKIAARAYPNNAAKTGNVKHILSHCGTIAARETEQCQLAYRLAECTTTLADK  
FKL

>AlucOBP35

MINVVFVLLIGTGIVSGGFMEALIECKQQHHVSKEEAMTGESEEVKCFSECVL  
KKSMMSDNNEFDEEKIQAEGARMIKNDEQKNREFEGAACACIEKVNGENP  
SEKCAKGHALFKCMKEAMPMSKMRG

>AlucOBP36

MKTFVGLIFAVALVEFASAVSKEYHDKAIAAKNTCAKLHNVDDETIMKFWKA  
HQLPEKEPETCIICYMKEMKLVVDGKVDADAWKASNKEKWDDEKHVAAD  
EIVDKCSAEVPPTENECEWGLALTKALKHGKEAGIPPPDMEHPKRR

>AlucOBP37

MDTHFGLLIASLAILHTANAVINKDYLEKVVTAKDCLKEFNVDSDVVEDFIV  
RYNKPQSESGKCMVACYMEERGMMKDGKTITEQVMLDNQEKWIAATHVNM  
GKEVIDTCDKEVPNEKNDKCDLAVDYMMCLVCRGDEAGLPKMDVAQLKH

>AlucOBP38

MGFKFVKYRSYFFVLVIHILCIQIKAKELTDEQKEQIFAEIKNCMESTKLTDEE  
FESIMAKKELPTSKEGKCFTKCLMEKMEYLEEGGKINVIAVQAGLEENMEKE  
SEITKAKEIIQQCADTVPPEDSCEYAYGISQCMYTKMKEAGISGGP

>LstrOBP1

MNVKMSALLKVGFLVFLVYLCYSYGAIPALTEAQIEQVGKAMANMCISSSGVQ  
RSLITKAMKGEIEDDRKLCFFGCIMEAVQVTKNGRMQPEVLKRRANAMPLPK  
TMREMILPTIDSCSHIENEDKCELAYSIVKCHFSVNGKNPFFNF

>LstrOBP3

MERTRLFIILAFMPFLPSALGANFAMMQQSLQGTNIPMIQSIAGELKFCMDVN  
SEQNSDGLDDYLPLLFNEELPTTLGQKCFCLTCLFNRFLLKDGFLDTQTAKTL  
VETFYKDKHDEKTMANIAINVCHVSAVPDVLNPCEIGFSLKSCFVDSNKKGKE  
LRHKN

>LstrOBP4

MKSLIVCVVVSCLLVANTKADEATSSKPSSSPNAADALIASTTLSPASNETDAA  
RAAIKEQLAKLTESCKTSSQANSDEAKIIGTESVPKTEGEKCFLQCVYTGLGIV  
KNEQFSVEGAKLLAQKRFGSFPEELEKANQLIETCSKEAVKKDSKDKCPMGF  
LIRQCFVKNQKINFFPKA

>LstrOBP5

MKCQVLLALFVVAACEVCYAGLTPEKLEKPLIDTCIKQSKAEETIGKLO  
NGHEIPSSQTGKCFIACMAEHMKLMKDGKFEPAAMTMEFIDKMOVQDKDAAE  
IKKAVDDCFKSVPDTGDKCEMAAGLATCMKEHHAELAGMN

>LstrOBP6

MLYVLYFVIVTSALSAVITQIMAADSSDMLTVFNKCRDKTSATEDDIKTFRAQ  
QIPSTTTGKCMFLACMFNHSGLMKDGKYDSEGALKLVGQVFADNPIKLGKAR  
QLINGCTDEVKKENDKCEIASKIADCTVKMSSQVGLS

>LstrOBP7

MKASAALTLVFLALAVFHCSEAKIDKAKKEAAIKKCAETSASDEDVKKVRK  
EHVVPSEEGKCFIACGFNTYDMLKDNRINLEGVNAFFEKLYDEQEKRDAIK  
AAASCAATESISGLNECHVAAKYFACLQRHPDFVKMKEDFDV

>LstrOBP8

MITSALTPSAVLAACLLLATAYAYDFSDPYFNEHLQSAMEEIMEEEMLSIGRVQ  
RDADQGQEVADYFKCKHRNLKTCCKINLMKNYGDKGKIYGKQCYEEVV  
SAFKSNSSTADDDDSMMDMFSCEKVKMIKLKHCIVHECIGKTKILKEDGSL  
NAEEIKQYAREYMFNEEWSKELGEKALDKCLTQTYNSVTKMLDEYEIKCNPT  
SVQFHHCLWKEIEMTCPEKVDLAKACVRLRERLRKQQAAGM

>LstrOBP9

MSRLHKFAISGMAVLAGAMLIAAEDTTIKIKNPSPHKQQQVYCQAPPTAPERL  
ERIIQCQDDIKTALLQEALNVLTDTSPRDLVKKTRSKREVFSGEEKRIAGCLL  
QCVRKVKAVDDQGMPTVPLVRLYSEGVQDRNYVAVVQAVQQCVSASQ  
HFRYYNPQVLKEDGYTCDLAYDMFNCVSDKIEAFCGRTP

>MperOBP3

rfsteqidyygkacnaseddlvvksykvpttetgkclmckmitklglnddgsynktgmeaglkkywsewstkie  
ainnkcyeeallvskeviatcnysytvmaclnkqldldkst

>MperOBP6

pnilpgldstwekcyekfiqfdkpetkeykemshgkeppclfcifmesglttndgklnedaitkkmteginndek  
wkstwksldkcfddvkqedkkqilimntpagrlmkcflrdiymncpenvwvesseclnvknlvqkcpempppv  
fqsapkli

>MperOBP7

ylseaaiktqqmlktvcskksveedvftdikkgifennnnikcyfacnfktmqminqgtdkklfdkmsm  
mappniynillpaieqciqidkgeelcqsynfikcahrvdpsksleyp

>MperOBP8

ennqqnssdrsatifqsciaetklsgdalkgfrmsipktqaekcmmgclmrkvnvinkgkfsveeatkvaqkyyt  
netmmkkakdlidvcakkaqstteecalagivttciveaqkaglagpggsrsrrtvsfkfrmsm

>MperOBP10

strpqpdeleeikktlynacagkfpitemkkdilnsnmvddqnfkclrfcdemsmidedgiidgeslismatdnl  
kpviqqivqscvkdikqdgceaafniscglklnpmtiqlpl

>NlugOBP1

MKSFIVCIAVSYLLVANIKADEATSSSDAESLITSTTLSPASNESDAARSAIKEQL  
AKLTESCKTSSQANSDDAKIIGTESVPKTEGEKCFLQCVYTGFGIVKNDQFSVE  
GARLLAQKRFGAFPEELEKANQLIETCSKEAVKKDSKDKCPMGFLIRQCFVK  
NGQKINFFPKA

>NlugOBP2

MKCQIVLAALALATICEVSYAGLTPDKLKLKPLIDTCIKQSKVEEDTLGKLHN  
GHEIPSSQSGKCFIACMAEHMKLMKDGKFEPMTMEFIDKMOVQDKDKAAEI  
KKS LGECIKSVPEGDKCEMAAGLATCMKDHHAELAGMN

>NlugOBP3

MKASAAITLVFLSLAVFHCSEAKLDKAKKEAAIKKCQAETQATDEDVMKVRK  
EHIVPDSEEGKCFIACGFNSYDMLKDNRNINLEGVNAFFEKLYDEQDKRDIAIK  
AAASCAATETVSGLNECHYAAKYFACMQRHPDFAKMKDDFDI

>NlugOBP4

MERTSVLIVFTFIPFLSSVLGANFLMMQQSMQGTQMPMIQSIASELKFCMDVN  
AEQNSDGLNDYLP LLFNEELPSTLGQKCFLTCLFNRFGLLKDGFLDTKTAKNL  
VETFYADKHDEKTMANIAINVCHVAAPDALNPCEIGFSLKSCFVDSNKKGKE  
LRGKN

>NlugOBP7

MLLEVCRFSVFLIALFATVNGRFTEEEKQLMNQVHSQCISETGTSSEDLVTKATT  
GDFADDDNLKCYVKCIWSTLTVMDDEGNFDVGVLEVMLPADMKDVTMKA  
MNACTGVGGATPCEKAFAMTKCLYKEAPSDFFLP

>NlugOBP8

MVTSALMQTATAACLLLV TAYAYDFSDPYFNEHLQSAMEEIMEEEMLSIGRVQ  
RDADQGQEVAD EYFKCKHRNLKTCCGKINLMKNYGDKGKIY GKQCYEEVV  
SAFKTNSSTADDDDSMMDMFSCEKVKMIK LKHICVHECIGKKT KILKEDGT  
LNPEEIKQYAREYMFNEEWSKELGEKALDKCLSQTYN SVTKMLDEYEIKCNP  
SSVQFHHLWKEIELT CPESKVDLKA KCVRLRERLRKQQAAGM

>PsolOBP1

MKLLPVLLLLVGLLAAASSHHLHEALSDEDKQRHHQESEECIAESKLDPQILA  
DMKAGKKPDPIPRELHCYAKCILKKEGVMKEDGSINEDRPGRSDAAKCEDK  
AKPASLAEADQC DTAGKIMGCYAKNHLIPKF

>PsolOBP2

MQKFICVAVAILVISSVAAAFAPNDVHEAAGKCRL ENGIQSDAELNNVNDRKV  
KCYFGCFMREMGMIVNGKVNPDKEIELIKTITPEQYNEEIKAKVYECANITSVI  
TDVCELGMTSYLCVFGKV

>PsolOBP3

MKYLIAICALCFVSCISALTDEQKAKLKS YKEGCIYESGLNPAVIEQIKKGGSV  
FDDKLNCFSA CLLKRLAIMKPDG SIDEAVARAKIPKEVPQNKANQVINICKSQ  
VGRTQCETGGKVLGCLLKT KAVQFL

>PsolOBP4

MYTNIIIFVIAISYGPLCQSQDFLEKEAQVAGSEYMQGIVRYCTALHDTNTEDI  
VKTYNYEVSDNKAKCAVMCILQSVQIMDQNGQFREDELQSFLEKVPEPEKRE  
EIVTTLNDCVDTGGNNPCEKAFVFTKCLNKL RDMLPQSMVPAL

>PsolOBP5

MYFSVVFLFVLNNTLIVQGTSTGSLSFYTDQEHQALQLCSQEYQTVLDTPYFVA  
NARIPDESDHNMKCLFYCVPQKIGVTDDKGVINSVQIRDMLKTKYPSMSNTA  
VKILLKKCGKERKTMDKCDKWYEVSKCTWKLYLEYQEKIEAKRQKKTTSR  
PSTTHRAHHHLK KENTPIPEIINH

>PsoI OBP6

MLALVAFLFVASCYAAPQEMGSHVYEAEGDCFDAPPSITRDYLEGLKKVKKL  
PENPTRDFKCFITCVGKKIEAMSANGEFDFD TLKEITVLITGGEATHDDAHKM  
VSNCFDVEHDDDC EKAWKYIECKIEELKPYKFSKGFCPTCHE

>PsoI OBP7

MYLSTVSVIFSCIFALTQAAYDQKQILELTTKCKATPEDTRTALNYTVPETPTG  
KCLMLCMIKELNMLDSNDKYDEVLGLAALRKYWTEIKDAKLLDVNTNCVAY  
AKTLPPDTPSCEYGYKIMK CINSEFIKGNLFEE SFKKPIKIE

>PsoI OBP8

MNKFVAVLFASCLVALVSADAEINKQRAAAGEACKKEQNVGDDVAAILTSK  
QIPSTEAQQCFLECFY GKLGLVKDGLNAQGAQAIKAKFGDDKDKLALAD  
NIFKKCEEEVAKVASEKCGLGKAIRTCFVNNGDQIQIFPKSQ

>PsoI OBP9

MKYLASFVFLGVIVVVKADGAKSSTVPTTVKSATTVDAKNNKTANLTF SK  
NLKANDSVHNRFN AVATECKKELNANQEIMALLSSGALPTNEKQRCFLECVY  
NKVGLIKDGKVNEEGAMSLAKAKFGENKDLMTKAEALFKKCKTEAVVEKDS  
KEKCALGRLIRTCIVNHGNNLPIFSKAS

>PsoI OBP10

MKDLSFILFITFCGLTYAAIEKEQAVTDCVTELSIDEEIRAHFKNHGEIPDET DK  
NAKCLFHC VSKKMDFTDEDGSIHKEKVIDYIMQKYPDLNKAKIEPVLLCGE  
RSETDPCEK WYEFTKCQLKAYLEYKKTQ

>PsoI OBP11

MAHIFKIVTVYILGFMYSVNGESKLM SIMIENLMDCMAQAPENFSLDVCQEM  
LRDGN DNSLVKYD SCKCLGACTSKKLGIMDANGIGVSKSVEEYIAQLDNEV  
WRNEAIKILKKCADTPGKNCDLSYNFMVCTMENS SLVRDFVKAMTSGDKSK  
EEN

>PsoI OBP12

MLSFALIVFAFFQLGFAVDKKEIMASCMQQYSVGEEVFKNFLQNGEVPDES NK  
NQKCLFLCVISKLGM SDESGNMDMPKVKEMMVAKYDKMTPENVIALVEKCA  
VRSEADPCDKIYQFHKCHMKPYLEVVNG

>PsoI OBP13

MNSLGICVIFSCCLFVLTQA AWEKAHIREAISKCNATEKDADVLLTKFSAPDTP  
SGKCLMLCVLKFYNMIDSLGKYDEAAGLARLRERWTEIDDAEVVAANSNCV  
AFGKTIPDASACEYGYQIMKCLIQEV TNGKFYEKSMKKLAEKKEATTSN

>PsoI OBP14

MSGMFKNCLLILSFVCLTCYVNCEGELPTKGISQRCKTPAIAPQKLERIIGQCQ  
EEIKSLLLQEALDVIGIENQDGS LTTPIRNKRQTKEQTASFTNEERRVAGCLLQC  
VYKVKAVDES GFPQVDGLVRLYSEGVQDRNYLAAYTAVQQCIGIAEAVKQ  
QQPSQKFDGGQICDLAYEMFDCVSDKIDQFCGLTPERV

>PsoI OBP15

MFKLTSLILLFCVSTHVFADDIPEELKEMIKNLHNQCVGETGVSEAAIADANN  
GKFNGEESLKCYMKCLMASVGIHDDDGVFDFGEAFVDLLPNSMKSHGEKLVK  
ACKPEGSNACDVAYNLNLCNYNLDPSKYTYL

>SfurOBP1

MNSLIVCVVVVSCLLVANIKADEATSSSSPDADSLITSTTLSPTSNETDAARASIK  
EQLAKLTESCKTSSQANSDDAKIETESVPKTEGEKCFLQCVYGGGLGIVKHDQ  
FSVEGAKLLAQKRFSGFPPEELEKANQLIETCSKEALKKDSKDKCPMGFLIRQC  
FVKNQKINFFPKA

>SfurOBP2

MKCQVFLASVFLVAVFELGYAGLTPEKLKEIKPLIDTCIKESKVEEETLGKLNH  
GHEIPSSQSGKCFIACMAEHMKLMKDGKFEPAMTMEFIDKMVQDKAKADEI  
KKAVDDCFKSVPDGDKCEMAASLATCMKEHHAELAGMN

>SfurOBP3

MKASASLTLIFLTLAVFHCSEAKIDKAKKEAAIKKCAETSASDEDVKKVRKE  
HVVPDSEEGKCFIACGFNHYDMLKDNINLEGVNAFFEKLYDEQEKRDIAIKA  
AASCAATESVSGLNDCHVAAKYFACLQRHPDFVKMKDDFDV

>SfurOBP4

MNTFQKFIFSGMVVLGAMLITAEDTTIKIKNQSPHKQQQVYQCAPPTAPER  
LERIIEQCQDDIKTALLQEALNVLTDTSRDLVKKTRSKREVFSGEEKRIAGCL  
LQCVYRKVKAVDDQGMPTVPLVRLYSEGVDNRNYYVATVQAVQQCVSASQ  
HFRYYPQVLKEDGYTCDLAYDMFNCVSDKIEAFCGRTP

>SfurOBP5

MVTSGLVQAVIAACLLLVTAAYDFSDPYFNEHLQSAMEEIMEEEMLSIGRVQ  
RDADQTQEVADEYFKCKHRNLKTCCKINLMKNYGDGKGIYKQCYEEVVS  
AFKTNSSTADDDDSMMDMFSCVKMIKLVHECIGKTKILKEDGSL  
NAEEIKQYAREYMFNEEWSKELGERALDKCLTQSYNSVTKMLDEYEIKCNPT  
SVQFHCLWKEIEMTCPEKVDLAKACVRLRERLRKQQAAGM

>SfurOBP8

MLYVLYFVIVTAASSAVITQIMAADSNNPDMQTVFNCREEASATEDDIKTR  
AQQIPSTTTGKMLACMFNHSGLMKEGKYNSEGALKLVGQVFAADPVKLGK  
AKTLINTCSDEVKNENDKCEIASKIADCTVKMTSQVGLS

>SfurOBP9

MERTHVLIIFAFIPFLSSAMQADFAMMQFPMQGTGTPMIQSIAGELKYCMDV  
NAEQNSDGLDYLLFNEELPTSLGQKCFLTCLFNRFGLLKDGFLDAQTAKT  
LVETFYKDKHDEKTMANIAINVCRVSAVPDILNPCEIGFSLKSCFVDSNKKGKE  
LRGKN

>SfurOBP10

MSTLLNFVFLVCLCSYSEAIAPALTEAQIEQVGKAMANMCISSSGVQRSLITK  
AMTGEIEDDRKLCFFGCIMEAVQVTKNGKMQPEVLKRRANAMLPKTMRE  
MILPTIDSCSHIENEDKCELAYSIVKCHFSVNGKNPFFNF

>SfurOBP11

MLEVCRFSVFLALSATVYGRFSEEEKQLMNQVHTQCVTETGTSEDLVNKA  
TNGDFAEDENLKYVKCIWSTLTVMDDDGNFVDGVLEVMLPADMKDIVMK  
AMSACIGAGGGSPCEKAFVTKCLYKEAPADFFLP

>SfurOBP12

MRGYILVLCVLLFMRGMASGLVAAELEKLNKNSCLKKSGATEDTARRLVGINV  
VTENHVESCFLTCTIYKGLKIVSSDNKFPQDPTVKKIADDFLGRNLKVITYQIAD  
SCTKEIKADPADKCSIGASFRNCFSKYGKELGFFPHM

>TbraOBP1

MKTALSILAVCLVIAYVNGAAAPNNVKDKVGALAKKCAADHKANQEQA  
FTQKLPDTEVERCYLECVYTGVIQGGGEYSVEGSKKLATQRFSDAKEHETV  
NKLIDTCSKEVTKVKDEKCSLGRTVRECFVKHGEKVHFFPSAN

>TbraOBP2

MPKFYTSLLAFFIFSFSSMIIGNEEECMRQHNISRSFLDDEKREDKCFLACFMK  
EQKIMNEEGHVMVKEKMLEYFDQVEGDHPHAECREAVLHCVDMVEKEGDDC  
ETAYKFDLCVNEKETVCALDEN

>TbraOBP3

MEARYCIEECVYKGVLLDESSTELNHERLIQEFKRGVAGAGQWGTVMDEAI  
NVCTGSSGQESSDSSCSEIPHAFTTRCLIRQLFLNCPADKWNNSAECNLVKDRM  
QVCPNIPPPPIQHRPHNDSN

>TbraOBP5

MKAVTFLCLAASLLVIAQGESTTTEESATAQDNDKSTTVGGSTVSKTPEEIRQK  
IKEQVEALTETCKTQAKLTPEQTKIATNMAVPKTEAEKCFLECIYNGIGLTKEG  
AFYEQGARTLAQQRFMGAPDDLAKANTMIEACTKEVVVKDANEKCGLGRL  
VRECFVKNKAKINFFPKP

>TbraOBP6

MGPSRIVVLVSTFIVSIMLLITDTHGAMTEAQMKAQAMKTVRGMCLGKSGATK  
EALDKMQEGIFDEEDRNLCYLGCMGMMQAVKNNKINLKMVRSQITKMLE  
PEVGKRILTAFEQGCQDTVGEDNCDLSFKFAKCLYDADPSAFIVP

>TbraOBP7

MNVIIDYENDRWFGQDHRKRRQSGRGNDSHSYGSNRREQNDENKYNSDPFN  
RHYNTSRGGTTSIGSPLEDIDACVIHCIFRQMKMVSDSYLNRNTVLNLTRRI  
KDQELKAFIQEAINFCFENLDPDDEEICDYSKSFAMCLEEKGKSNCDWDLA  
KFDRNNRSRNNNNNNQNGFSYQNSRG

>TbraOBP8

MYQFHFLFAILVTINFVQSKVVHKRETHHEVLELKGLNKKELKDLELKVFEEC  
RVESNLDKTTFDGYRKMENDVPNEEGFKKVSSCYSERMGFIANSKVNWEKL  
KEAAEINHSDNKDYHDKSLNVIKDCEGKSYEELSHIDVAYKFAKCMKEGYLQ  
AG

>TbraOBP9

MTLGHILITGLIICAVTLVNSSNDVIKKNKEYAKNCMKKFPVKKSSLQEMYST  
FHVPEKLNLCFLGCLLRKVGLIKRNYIDWNVSRRAHKLNQDPVYKRTEV  
MIKRCKKEIIPNFRDKCQLAADIISCKLKYSQKFGIPIMRMQ

>TbraOBP10

MMHIYAVLSLLSAITICKVDASGAETVKKALEVLSKCQKDFSVDGTVTGIMS  
FNGVPQSKEAKGMVTCWMNGVGLKDGKPFVVEIKIWHQVLFKNEEHKKL  
ADENVDFCVGNLKAKEESELAYELTKCFMTRAAETGLPPPELQIE

>TbraOBP11

MMYIYALLSLLSAITIHKVDASEGETVRKAMEVLSKCQKEFSIDNGTVIGFVSL  
SDIPESKQAKGMVACWMNGLGFFKDGKPFVEGMKRWHKVMFRSEEHQKLA  
DENAVICVANLKSEEESEMAYELCKCFVTRAKETGLPAPELRIE

>TbraOBP12

SAITICKVDASGAETVKKALEVLSKCFQKDFSVDGTVTGIMSFNGVVPQSKEA  
KGMVTCWMNGVGLKDGKPFVEEIKIWHQVLFKNEEHKKLADENVDFCVG  
NLKAKEESELAYELTKCFMTRAAEVIIRKII

>TbraOBP13

MFLYTLFFVTHIVYMTNAVIDVGKLTTKSEVLETEKKTMEDCLNKAGLKYTM  
LKDHLNGQTPEATKELKCVLGCYTEELGYVKDKKTQWHVIEMVHQIEYKTE  
ENLEKGSQILKNCKTIVPEVAVDTC DAGYALYTCYMKQAIKVDLHP

>TbraOBP14

MFLYFLTHIIYITNAAVDIKGLTKAELAELEQKTMTECLKKHSVNETLLSEF  
LNEETSESTSKEFKCVLGCYTEEMGYGKDKKPQWDVMEEVHKIEYDNDEDK  
EKALKIVKTCKTIVPEEVEDSCELGAMHSCYLDQSKKVGLLLV

>TbraOBP15

MMHPLIFVLGAVFFLMFDGAYA AVELSDDMKEMAKMLHDQCVDSESGVNGA  
LIEPCSRGDFADDGNLKC YFKCIFANMGALSDDGELDTDAFESILPPDLHDPLS  
KMINNCKDPKGADACEVAFNFKCLYTTDPEHFLVI

>TbraOBP18

MTRFIALTFLTLILVASITAQGNEKILQIFNKCEMHKLSSDELAMIQSKEVPSS  
PEAKCMTACMLKEGKLIIGSTYMKDNALMIADALFKDDASMAAKAREVVEH  
CATEVGVDVGGDECEFA YKLAVCSDNHAKKISVTRPF

>TbraOBP19

EEVDFKGMTPKEIDDLEEKTYEDCRLELNISNSFLEEYKTDGTGVPDAIEFKK  
QIACFNIKLG YVKGTKINWERIKLSFEVYYHDNKKKLDLDMVEDCQKMP  
LDNLDEIEVS YLLAKCSKEGYAEVMECCLKNVN

>TbraOBP20

MKGFTTVCVFTIAITVSLAIDEAAKKKAINTFNKCKEQHPITDAELEQIKKHEG  
LPSSQNAKCLAKCMLTEGNILKDGKYKTDIAIAFTETLHSDNAEEAEKARQV  
VEHCASTVGTVDGSDACEYAYKMAQCGYSKAKEIGLEKPEWE

>TbraOBP21

MYMYSETGVINMKAELLCVLLTITIAK VISENTTVSDEDPETLQYINCIQKYNI  
SGTEVPASGSYAEKCGNACAMKAKGMLTDEGEFIKDRMLSQKFQPYVTSEDI  
VKMQMAIDFCVKQVSNEGDECEKAYGLMDCMQTKVMESSRSMK

The MEME analysis of CSPs

>BtabCSP1

ADTYTTQFDNIDLEAILKNEKLV DNYTKCLMDEGPCTNEGRTLKLLPDALK  
TACAKCTEKQKTGARKVIK FYQTQHPEDFKKLQKQYDPEGKFKAEFEKALFG  
QTL

>BtabCSP2

APAEDKYTDKYDNINVDDILGSKRLLKSYLTCLLDKSPCTPEGSELKRLLPDA  
LKTACSKCTEKQKEGAARIVERVTA EYPTWEKELSAKWDPTGEYWAKYKPL



VQEYLKASA

>BtabCSP3

AAATKESTKESTYTNKYDNIDLGKILTNDRLFLNYFKCLMDEHTCSPDGAELK  
KVLDPDALSNKCAKCTERQSRGSEK VIRHLIDNKPEMWAKLEAKYDPKGTYR  
KTYKNEAEKLGIV

>BtabCSP4

APAPLEQSDLEKFENMDLSSILSNKRLRTAYVNCMVDPKGPCTADAAEFKKILP  
DLTETQCADCSAKFKELIKSVSTFQKDYPEDWKTLMAHFDPDNKRAADLE  
KFMSS

>BtabCSP5

DDFYSDKYDNIDLDSILASKRLIRNYMNCFQGKSPCTPEGTYLNQVLPEALKT  
ECAKCTEKQREGAVKAIKKLSAEYPEEWKEITDKLDPTGEQYAKFKARFP

>BtabCSP6

MVCSEIVRCLTYFQVISLVYRLASAQSNRATYTTKYDYINVDAMKNERIL  
KMLVECMLEGRCTREGLELKAAPDALATDCAKCSQMQRKHASRVIAYLIT  
YKKEYWNALATKYDPDGSYRRKYGIQQPQELSAGAAIQSPNLIKPTKTVKK  
TVTTVNNNTNLFKAKKRMTRREEKEMVRRRFPQLHFMPNMWASNIQKIEKK  
SERAPSIARRNVRRKAHTPTRRHSTQRTAPKRGQETG

>BtabCSP7

MPAPQTTTRATISDEALESALNDKRYLMRQLKCALGEGVCDPVGRRLKTFAPL  
VLRGACPQCSPTETRQIQKVLSHIQRHHPKEWSKIVKQFTS

>BtabCSP8

ASTYTTKYDNIDLDEILNNDRIYKKYYDCLANKGKCTPDGKELKDILPDALKT  
GCSKCNEKQKKGSEKVIKFLDKKKADYDVLEKIYDSNGVYRQKYADEAKK  
R

>BtabCSP9

APAEFYTSQFDNIDIESILKNEKLLDNYFNCLMDEGPCTLEGRTLKSLLPDALN  
TSCAKCTEKQKKIARRVMTFYLDKYPANSARIKKYDPENKFKDGIKALLGS  
R

>BtabCSP10

APAETYTTEFDGIDIDSVLKNEKLLDAYAKCLLDEGPCTREGRTLKTLPPDALE  
TTCAKCSPTQKEKAKKVITFYMEKYPENAQKIMKKYDPTGKYRKALEEAF  
GSL

>BtabCSP11

AISDDEYRLETLCSSPALEHFDITPILKNDRLVSSYFKCFMDEGPCTNEGKMVK  
RIIPEIMRTQCRNCNPTMRRIVRTVMKHMVFQTRPRDVDDFFLKYDPHEMYD  
DLIEFMDEDNDY

>BtabCSP12

LPQKGPASTPRKQSVVEALGKKPEELPKTMKEALKRMEAVDVEKVLNNDRIL  
TNYLKCFLNKGPCTSEAKNVKKSIALLVESRCVECDPKQRKIIKSMQVVKTK  
KPREYQELIKLYDPKGTQIAELEKFFASSK

>BtabCSP13

APPAGVDEKLLSKYDNFDVDRVLNNDRVLANYIKCLMDEGSCTNEGRDLKK  
SIPDVLGGCDKCTEKQKSVTEKVIKHLINKRPKDWDRLSKKYDPQGQYKN

KYADLYEKVQKEAAKESKEPSKPTKDTKETTKVTKDTKESAKAPKA

>AlinCSP1

MLKVLVLLAAVVCCVSAATYTSKYDNIDLDEILSNTRLYKKYFDCLANKGK  
CTPDGKELKESLPDALKTNCAKCTKKQEGTDKVFRHVLKNKPNKYVLESI  
YDPPGIYRKKYEAEAEKRGIKLPGSH

>AlinCSP2

MKVAVLVLLCVGAALSAEVYTSKYDNIDVDKILSNDRILTRYIKCLMEEGNCT  
NEGKELKKTLPDALASGCTKCSEKQKAQTEKVLRLHLSKNRPRDWALLKTKY  
DPKGEYSKKYEKEAKALTA

>AlinCSP3

MISKLSMVLLIGAFADVWAAEQYTDKYDNIDIDEILNDRMYKKNYFHCVMG  
NGKCTPDGLELKAKIPEALQTECAKCTDKQKKEVEKVLRFIINQKKDDYKLL  
EEKFDPEGVYRKKYEAQKLVVEEGKPIEY

>AlinCSP4

MRIILSAFLVAMACSLATCEMTEEEFYTKVFEEVDPDFILDNERILTSYLKCFYN  
EIECNAHAEVVKKSIPLVATVCGRCSKQKSIFKYSLNKFIPAHPKDWEKILS  
IYDPSGEAWPKVKAFIES

>AlinCSP5

MGHLTIVLLAAAFEVLTGSRAYTTHYDYIDVDQVLNNTRLYTKYVECLLGQG  
KCTPEARELRDKLPEALQTNCAKCSERQASESHRVIRFLIQNRQEDFKLLEAK  
YDPSGLYFKRFEEETKRNVSLS

>AlinCSP6

MFYKLSVVVLMGILAGVWAADKYTDKYDNIDIDEILTNERLYKKYFDCIQGT  
GKCTPDGIELKEKIPEALKTECAKCNKQKAGVEKVMRYLITKKPEDFKILED  
KFDPEGVYRKKYEAQRKLVVEEGKPVVEY

>AlinCSP7

MNYKLSVILLIGVLASVWAASTYTDKYDNIDLDEILTNERLYKKYFDCIQGKG  
KCTPDGTELKEAIPDALKTECAKCNKQKAGVEKVLRLHLLTKKAEDYKILED  
KFDPEGVYRKKYEAQKLADEGKPIVL

>AlinCSP8

MDYKLSVMLLMGVLACAWAADKYTDKYDNIDIDEILNNERLYKKYFDCILG  
NGKCTPDGTELKETIPDALKTACAKCNDKQKAGVEKVLRLHLLTKKAEDYKIL  
EAKFDPEGVYRKKYEAQKLAEEGKPIAL

>AlinCSP9

LAVVTREMREREFFRQLEVINVDSILINQLIDKYIKCLLKTGKCDPIMKDLRI  
ALPLILGHLCEARCSEK

>AlinCSP10

MRSNFINESIPDVLATVCGRCSKQKSIFKYSLNKFIPAHPKDWEKILSIYDPSG  
EAWPKVKAFIES

>AlinCSP11

KFFSGLLLVCMASVSLCADEYTDKYDSVDLDEILNNQRLYQKYIDCVMGKG  
KCTPDGALLKEKIPEAS

>AsutCSP1

MLPFYVFSLCAVAVACQETYTSKYDNVNVEDALKNDRLYKAYFNCLADRGF

CTREGNMLKEALPDGLRNNCSLCTDPQRRGTHQVIRFLFKYRPEDMKLLEEI  
YDPEGIYKTKYAEERKKLME

>AsutCSP2

MGHFPPVFSLSPLVLLVASLHTMNTSTLLKIAFLLGCVAACLAETRSSVSDEAL  
EAALKDKRYLTRQLKCALGEGACDPVGRRLKTYAPLVLRGACPKCTPSEVRQ  
IQQVLSHIQRHYPKEWAKILKQYAGQ

>AsutCSP3

MKFVAALLVASVAVLAVEAANQYTTKYDNIDLDDILKNQRLYKKYFECLTGK  
GKCTPDGKELKEHLPDALKTGCSKCSEKQRAGSEKVIKHLKKNKPQDYAVLE  
KIYDPSGIYKKKYEA EAKKLGIV

>AsutCSP4

MRIILSAFLVAMACSLATCEMTEEEFYTKVFEEVDPDFILDNERILTSYLKCFYS  
EIECNAHAEVVKK SIPDVLATVCGRCS DKQKSIFKYSLNKFIPAHPKDWEKILS  
IYDPSGEAWPKVKAFIES

>AsutCSP5

MDYKFFVVMQIGVISSVCAAGTYTDKYDNVNLDEVLNNERLYRNYFNCLQG  
KGKCTLDGAILKEVIPSALKTDCALCSVRQKKGAEKVLIFLITKKPDDFKILED  
KFDPEGVYRKKYEAQRKLV EEGKPIH

>AsutCSP6

MVCKLFAVVLGMILAGVWAADKYTDKYDNIDIDEILTNERLYKKYFDCIQGIG  
KCTPDGIELKEKIPEALKTECAKCNKQKAGVEKVMRYLITKKPEDFKILEDK  
FDPEGVYRKKYEAQRKLV EEGKPV EY

>AsutCSP7

MVSKLSMVLLIGALADVWASELYTDKYDSIDIDEILNDRMYKNYFN CVMG  
NGKCTPDGTELKAKIPEALQTECAKCS DKQKKGVEKVLRF LIKEKKDDYKLL  
EEKFDPEGVYRKKYEAQKLV EEGKPI EY

>AsutCSP8

MDYKLSVMLVMGVLACAWAADMYTDQYDNIDIEEILTNERLYKKYFDCIIGN  
GKCTPDGTELKETIPDALKTACAKCNDKQKAGVEKVLRHLLTKKAEDYKILE  
AKFDPEGVYRKKYEAQKLV AEEGKPIVL

>AgosCSP1

MNILTIFCYVTVMCDTQVKPAVSAQRLQSVNQNVPTNDGRKTIRETSSYPTR  
YDYIDIEAVMNERIIKILFNCVMSRGPCTREGLELK RIVPDAIQTECAKCNER  
QRKQAGKVL A HLLQYKPEYWKMLVQKFD PNNVYLRKYMADNDDDEKLSL  
QKLSNDTTKKRNI

>AgosCSP2

MAHLNLFVVLIASLIYFTSAAEEKYTTKFDNFDVDKVLNNRILTSYIKCLLDE  
GNCTNEGRELKRVLPDALKTDCKCTDVQKDRSEKVIKFLIKNRSTDFDRLTA  
KYDPTGEYKKNLEKFEKERASAKPLKA

>AgosCSP4

MDSRIAVVCVVLAAFAVDQTVGAPQKDAVAASGPAYTTKYDHIDVDQVLASK  
RLVNSYVQCLLDKPKCTPEGAE LRKILPDALKTQCAKCNATQKNAALKVVDR  
LQKDYDAEWKQLLDKWDPKREHFQKFQQLAE EKKKGFTKF

>AgosCSP5

MHCKVLIALCCVAVYAVQASPAGTATAAAVSADDEIKDFPAYMKRFDKLNVE  
QVLNNDRVLASHLKCFLNEGPCVQQSRDLKRVIPVIANNGCNGCTERQMTTI  
KKSLNFLRTKKPTEWARLVKIYDPSGTKLNKFLDA

>AgosCSP6

MIKLILAI AFCVSITMTVVQTAPAKYTTKYDNVNIDEILNNDRLVASYFKCLME  
TGKCTPEGEEIKRWLPEAIENKCEDCSEKQKLGSEKIIFLFEKKNDMWKQLE  
AKYDPQGTYRQRYAEEAKKLNINV

>AgosCSP7

MSRSSSVTMKVFVIAICVCAALARPEDVKVENKPAVIKSETLAAPLPTNIVKR  
ATDTIQLDSSLPNVSEDLVKALSDRRFVQRQLKCATGEGPCDPIGRKIKAHA  
PLVLRGMCVKCSQSEIKQIQRMVSHIQKNYPKEYTKMLKQYQSGF

>AgosCSP8

MNNIIMNNSRGRYGIFSLAVTIAAIMLVHQPATVRCADGGIITPQQQQQTM  
MFTAPTGYVYSTYDHIDVGRLLRNNKVVSQYVVKCFVNEGPCPDGKLVKAY  
LLPEIIRTVC GKCTPRQKDMARMVLKHIYTYRQADFEKIMQIYD TDGKRNEIL  
AFMNH

>AgosCSP9

MSAFCLNSFILMTMITVIVTHATFTRSTKFDDRTGIDIHLVKRDTDDVNDDENS  
VESDEGFFYRFTHFFQDSSDKEDDDDDEKKPDFITTFDIFKLLDEEYAMQQFY  
CVINEDPCDEVMRLKATIPEEINRNCERCTSTERNNIRRILNYVKKHYPQFW  
KRVEPIYKKKI

>AgosCSP10

MINTRPRKLVRCIRGVSISVAKGDDAVNAENKDDDSHLVNREEIQRYMSMME  
KINIDQMLNNTRLMSNNVKCFLNEGPCTAHLREMKKMVPMLVKDSCSSCTK  
EQKIMMKKAMD AVKARRPNDYEKLSKFFDPEGKYEKKFLENL NESK

>AlucCSP1

MLKVLVLLAAVVCCVSAATYTSKYDNIDLDEILSNTRLYKKYFDCLANKGK  
CTPDGKELKESLPDALKTNCAKCTKKQEGTDKVLRHVLKNKPNDYKVLESI  
YDPTGIYRKKYEIEAEKRGIKLPESH

>AlucCSP2

MASKLSVLLIGAVGMVLAADKYTDKYDNIDLDEILGNQRLYQKYFDICIQ GK  
GKCTPDG AELKETIPEALKTECAKCS DKQKAGVEKVL RHLIREKPD DYKVLE  
DQFDPEGVYRKKYEDLKKKVEEGKPIEY

>AlucCSP3

MKVAVLVLLCVGAALSAEVYTSKYDNIDVDKILSNDRILTQYIKCLMEEGNCT  
NEGKELKKTLPDALASGCTKCSEKQKAQTEKVL RHLSKNRPRDWNRLKNKY  
DPKGEYSKKYEKEAKAISA

>AlucCSP4

MKFVAALFVASVAVLAVEAADQYTTKYDNIDLDDILKNQRLYKKYFECLTNK  
GKCTPDGKELKEHLPDALKTGCSKCSEKQRAGSEKVIKHLKNKPSDYAILEK  
IYDPQGSYKKKYEAEAKKLGINV

>AlucCSP5

MVGKLSVLLIGAVGMVLAELYTDKYDNIDVDEILGNQRLYQKYFDICIQ GK  
GKCTPDG AELKKNIPALQTDCAKCS DKQKAGVEKVL RHLIN EKPEDYKVLE

EQFDPEGVYRKKYEHLKKKVEEGKPV

>AlucCSP6

MVSKLSIVLLIGALADVWASELYTDKYDNIDVDEILGNQRLYQKYFDICIQGGK  
KCTPDGAELKKNPEALQTDCAKCSEKQKAGVEKVLRLHLINEKPEDYKVLEE  
QFDPEGVYRKKYEHLKKKVEEGKPIEY

>AlucCSP7

MVSKLSIVLLLIGALADVWAAELYTDKYDNIDIDEILNNDRMVYKNYFNCVVMG  
NGKCTPDGLELKAKEALQTECAKCSKQKKGAEKVLRFIINQKKDDYKLL  
EEKFDPEGVYRKKYEAQKLAEEGKPIEY

>AlucCSP8

MLKVLVLLANAASTYTTKYDNIDLDEILSNQRLYKKYYDCLANKGKCTPDG  
KELKEALPDALKTNCSKCSKQKQEGTDKVLRYVLKNKPNKYKVENIYDPS  
GNYRKYEDEASKRGIKLPGSH

>LeryCSP

MDSRIAVVCVVLTVFAVDQTVGAPQKDTAVVNGPAYTTKYDNIDIDQVLASK  
RLVNSYVQCLLDKPKCTPEGAELRKILPDALKTQCTKCNATQKNAALKVVDR  
LQRDYDKWKQLLDKWDPKREYFQKFQQLAEEKKKGVVKF

>MperCSP1

MNTLLLAVALCIAITMTVVQTAPAKYTTKYDNVNIDDILNNDRLVASYFKCLM  
ETGKCTPEGEEIKRWLPEAIENKCENCSEKQKIGSEKIKFLIEKKNMVKQLE  
QKYDPQGLYKQRYSEEAKKLNLDV

>MperCSP4

MTNNNMNSPRCRPEIFSLAVAAIATVLVHQPSTVHCADAGVYPPQQQQQEQAT  
MFTAPSGYYVSTYDHMDVGRLLRNNKVVAGFVKCFTNEGPCCTPEGRLAKAY  
LLPEIIRTVC GKCTPRQKDMARLVIRHIYTYRRGDFDKIMQIYD TDGKKNEIID  
FMNQK

>MperCSP5

MNCKVLIALCCVAVYAAHASPAGAATAAAASADEEIKDFPAYMKRFDKLNVE  
QVLNNDRVLASHLKCFLNEGPCVQQRDLKRVIPVIANNGCNGCTERQMTTI  
KKS LNFLRTKKPV EWARLVKIYDPSGTKLNKFLDA

>NlugCSP1

MFKNVLLVCLLVAVVSAKPKPAEKKQYTTKYDNIDLDEILNNQRLFDNYYKC  
LLGGKCTPDGQELREALPDALATACSKCTEKQRVGTTEKVIKYLIEKKPTEYSE  
LEKKYDPQGN YKRKYQAEAAKRGIV

>NlugCSP2

MSKLPVTLVLM LAVFSVDCGKLYKDRYTTKFDKIDLDEALNNQRLFESYLKC  
LMGDKCSPDGYELREALPDALATACAKCSEA QKAGTEKVIRFLIEKRPKEYAL  
LEKKYDPEGIYRDKYKPIAEMKGIKLD

>NlugCSP3

MKFLCVTIFECALIVVAFGMPQDTTYPTTYDDVNVDDILHNDRLFNRYFTCLT  
KKEGCTPEGKLLAATIPDALATTCAKCSAKQKTA AEKVIKYLIFNKRDKFDEL  
AKIYDPESNYLNKYLV DGFPAKV

>NlugCSP4

MFLIAVWALSPRRLPWGLPWGGLAGVAAQQQAKNTRYTTRFDSIDVEVILKN

ERIFRRYMDCLLDKGRCTPEARELKROLLPEALKTECLKCSEVQRRQGAKVMA  
FIIKNKRPSWELLAKYDPQGIFRAKYMYNENNIEAVLKQLEREQQGIYGTYS  
STNSTTSSNSTSIR

>NlugCSP5

MRCLLLVAVVCAALVAVCHAQDSKYTSKYDNIDIDKILKNDRVLSQYIKCLMG  
EGSCTQEGRELKRLLPDAIQSNCSKCSEKQRSASVKVMRHLRQSRERDWNRL  
LDKYDPQGDKRKNLKLD

>NlugCSP6

MLWAARFIVLPLLFCVLQVWSAPADEKYTDIDFDSILANRRVLSSYVKCLTDK  
GPCTPQGKELKIVPEVIQTSCTKCSPQQKVVVRNVITTMQSKYKDQWDLVV  
NKYDPKKQRSSELKAFLSGTD

>NlugCSP7

MASASSGTTSTTSAPKTAESASAKSSSKDEIPDQTFDRYINNERYMLMQYECL  
MGNKPCDHVGRKLLKAAVPLVVRGLGCPKCSQREEDQMKRIVSHVQRSYPDK  
WQKLIKKYGN

>NlugCSP8

MSSTMLVFVAVLCFSAVLAKPADKYTTKYDNIDLDEVLSNQRLFDSYFKCLM  
GGKCTPDGQELRDALPDALATACEKCSEKQKEGTEKVMKFLIEKKPTEFAELE  
KKYDPQGTYRQKYKAEADKRGYSV

>NlugCSP9

MKSQQLLVSCFICTWLVLVLMAPSANAAPKEKDPERKALYRLEYIDIEKVLDN  
NRMLTNFIRCFLRQGPCTPEARDFRKLKLPKLAKTMCSDCTARQRYIHKVFKH  
LMEERPKEWELMDRFDPRKYAERLDTFMVDMTTRAPVTSSPMPSSPVTLT  
SSSVTMSSTQRVIEILRTSTDMSNESRPAS

>NlugCSP10

MFMLLACSELGSGQQQNVDNIEMSIYDKMFENMDVNSLLKNHRLVDSYLK  
CFLNEGSCTHIGHEVKMMIPEVIKSRGTCGENQMRALKAGLRLFIVLRPDD  
WQRFLDVYDPDRKEWPHIKAFMDSDD

>PsolCSP1

MPSVLTTVLPSLLNRWLEMPVLLCVVDLCFLTANDGNSTIDITRASTMTDR  
LDAVDIDEVLKNTRLFNSYVKCVLETGPCTAEGREMRREMLEVELQTGCANCT  
EKTKVRIKKSFLRLKSDPRFRESYKKVLDKYDPDKKYIANLEKFLT

>PsolCSP2

MKLLVVLFITIAFAILSFSLCKGEANAANNNDIDSLLADKNFVRRQIHCVLGKA  
RCDKFGNNLKASIPKVISQNCQSCTPEEAANANKIVSFVKQNYPDVWKKVAQ  
RYSGQ

>PsolCSP3

MVLACSAALLVAVEAADYTNKYDGDVVDKILQNNRILNNYIKCMLDEVCTCT  
AEGRELKKVLPDALATGCTKCNDKQKETAQKVITHLMDKRPNDWERLVKKY  
DPKGEFKKRFEAQGKKF

>PsolCSP4

MKSFTFATLFLIAFAFTLAEDKYTSKYDNFDVDSVLNNDRILTNYIKCLLGEGP  
CTNEGRELKKVLPDALSTGCNKCNDKQKSVSRKVLVHLIEKKPAEYKKLAKK  
FDPDGKFEEKYKADILNATEKPKA

>PsolCSP5

MKNLVVLTFLAVAGVAYAADTYTTKFDNIDIDQILHNERLLKPYVNCCLLTD  
KCTADANELKRVLPALVTNCQKCEKQKQGAEKVISYLAKNKPEIWSKILA  
KYDKNNEYRTKYAETARRLGVPL

>PsolCSP6

MSAALWLLFFCLLMCLAADLPNAQPTYTTRYDYLDIDKILTNDRILKRLMD  
CIMDRGPCTREGKELKRIIPDALKTNCSKCNDRQKMNTGRALAYLLHYKPEY  
WFELNRFDQDGSFRRKLNIDADSSERSSAIVRKTRSIFLNRFRIEPSKKKLL  
NAGA

>PsolCSP7

MNQFVSFVALFLSLVSQIMCTTPATSTEDNSKQVDDVVRNEKIREVYIKCLLD  
KGPCSNEAADVKKMLPEAVQRGCEKCEMHHKIIKMMIFLKERQPETLQQIT  
AKFDPKGEFMKTFLTKLQQQHNQSNESGQQYQGNAPVFNQGNDRNHQQA  
KPVQN

>PsolCSP8

MKSFSIFAIALCAVVCCSVADDTYTTRYDNINLDEILASKRLVANYVQCLVNGK  
PCSPEGTELKILPEALKTKCAKCTPKQKEGAIKVITRVQKDYPEEWKLA  
WDPTGEYFRAFSAEAQAQA

>PsolCSP9

MSRRLSFFLLALCALAALAATEEIIYSDKYDYINIEEILANPGIRARYYNC  
FLETGPCQTPDAKFFKEKFPEALVTKCRKCTEKQKVSFQKIVEYYTEKEPE  
KWKMV LTKAINDAQKRSI

>PsolCSP10

MNKLVLALCALAVSVAYAEKFTDKYDNVDLDEVLKNERLFNSYKCLM  
DQGKCTAEGAELKKYLPEAIKTECAPCTEKQKEGAKKVIKHLTKNKPT  
EWKN LMDKWDPERKYREKYESRIDEILNS

>PsolCSP11

MTSSVIYLFALSASIVSVTCHKTLVESILEKYKADCEKVTDMEPFLKNE  
KLVT THVKCLLGEIRCNDGERIKKAILEVLPDACA  
KCTEKQKTIVRQVMQYMYKN RQSDFDKIFKIFDPDMKYKEKMMDFM  
NKKE

>PsolCSP12

MKVSTFKMDSKIISVFILISVIVTLSYAGEEIKTIGDFLKKFGNINMEE  
VLQND RLFQAYHKCFLEQGPCTPEAREMRNVIPSLVKTACDACTPEQ  
KKEMKKHLDY ARHNRAKEWEELLDKYDPKREILEKFLSSVPDK

>SaveCSP1

MAQLNLFVVLVASLVCFTLAEKYSTKYENFDVDKVLNDDSLLSYINCLL  
DE GNCTEEGQALKRVLPDALKTNCGKCTDTQKMKIEKILKFLMKNRST  
DFDRLT AKYDPSGEYKKKLEKFS

>SaveCSP2

MDSRIAVVCVVLAVFAVDQTVGAPQKDALAAGSPTTYTNKYDHIDIDQ  
VLAS KRLVNSYVQCLLDKKPCTPEGAELRKILPDALKTQCAKCSATQ  
KNAALKVVD RLQKDYDKEWKQLLDKWDPKREQFQKFQFLTEEKKK  
GVVKF

>SfurCSP1

MFNLLTLVCLSTIAVQIQAAPEEAQYTTKYDKINLDEILNNDRLF  
KSYFGCL

MGGKCTPDGQTLRDILPDALETACSKCSDTQKAGTEKVFKFMIEKKPSEFADL  
EKKYDPNGKYRARYEADA EKFGIKV

>SfurCSP2

MVLADTPTTSPKVETKAVESGKSSSKDEIPDQTFDRYINNERYMLMQYECLM  
GNKPCDHVGRKLKAAVPLVVRGLGCPKCSQREEDQMKRIVSHVQRSYPDKW  
QKLIK KYGN

>SfurCSP3

MQLLYALVFGCTLMVSSDMPQSTYPTKYDDYNPDDILKNDRLFNQYFICLT  
KKKGCTTAGELLSAIPDALATSCAKCSAKQKAIGEKVIRFLYFNKPDEFAEMS  
KIYDPEGKYLEMYIASGGLI

>SfurCSP4

MKCPLLSV SCLWISLLALSSSASAATKEKDPERKALYRLEYIDIEKVL DNNRML  
TNFIRCFLRKGPCSPEARDFRKL LKLAKTMCSDCSPRQRFIKKVFKHMEER  
PKEWELLMDRFDPRKYAERLDTFMVDM TTPSTTTTTSTPSTPMSSTTQR II  
EILRTSTEMSNESSP

>SfurCSP5

MSEILVTSLIFMLLAASELGLGQQQQTQKPQQQNV DNIEMSIYDKMFENMDV  
NSLLKNHRLVDSYLKCF LNEGSC THIGHEVKMMIPEVIRSRCATCGENQMRA  
LKAGLRLFIVRRPDDWKRFLDVYDPDRTEWPHIKAFMESDD

>SfurCSP6

MKLALFCCLLGLVA AVSAQSEKSEKPEKYTTKYDYINVDEILSNDRLFNSYYK  
CLMGGKCTPGGPELRTHLPDALQTNCSKCSEKQKEFSDKVIKHLMDNKPEEF  
SALVKKYDPEGIYKDAFKPKHNQ

>SfurCSP7

MRASKASSLVAVLLIAVWGFTGVQAQQKSKDTRYTTRFDSIDVEVILKNERIF  
KRYMDCLLDKGRCTPEARELKRLLPEALKTECLKCSEVQRRQGAKVMGFIIK  
NKRPYWDLLLAKYDPQGIFRAKYNYNENNIEGV LKQLEREQQGLYGTYSNT  
TNTTNTVNSTSTRK

>SfurCSP8

MLKFTLTLVLAVVSVNCGKLYKDRYTTKFDKIDLDEALNNQRLFESYLKCL  
MGDKCSPDGYELREALPDALATACAKCSDAQKAGTEKVIRFLIEKRPKEYALL  
EKEYDPEGIYRDKYKPIAQEKGIKI

>SfurCSP9

MRCLLLVAVVFAAFIAAARA DEANKYTSKYDNIDDKILKNDRVLSQYIKCLM  
GEGSCTQEGRELKRLLPDAIQSNCSKCSEKQRQASVKVMRHLRQSKERDWN  
RLLDKYDPQGDKRKNL KLD

>TbraCSP1

MRSMLTVCLLCMFVAACYTSSKYTTSYDNLDLDEILNNHRLYTRYFQCLTNK  
ARCTPDGKELKAVLPDALATGCAKCTEKQKQGSEKVIRFLLKNKPGDYEELE  
KMYDPNGTYRHRYEEEEAKKLGIV

>TbraCSP2

MSRTIAFFCLFVVACAYATSTYTTQYDNIDLDEILNNDRIYK KYFDCLAHNIKC  
TPDGKQLRDILPDALKTACSKCSEKQKKGSEKVIKFMLEKKRADFDVLESQF  
DPTGIYRKKYAEAAKKGHVHI



>TbraCSP3

MSRTIAFFCLFVLVCTYAASTYTTKYDNIDVEEILNNDRLYKKYYDCLANKAN  
CTPDGKELKDILPDALKTQCAKCEKQKKGAEKVVRFMLENKRADFDLEKI  
YDPSGTYRKKYAAEAKRRGINV

>TbraCSP4

MTRTIAFFGLFVVAGAYAASTYTTQYDNIDLDEILNHDRVYKKYFDCLVNKAK  
CTPDGKELKDILPDALKTGCTKCNEKQKKGAEKVIRFLENKRADFDLEKI  
YDPSGTYRKKYAPEAQKYGINV

>TbraCSP5

MQGLTVVLICSLATALSATTYTTKYDNIDLDVLRNDRVYKTYYNCLTNKGG  
CSPEGKELKDKLPDALQTGCSKCSARQKQGLEKIIKFLMNSKQADFKEFERIY  
DPTGEYRKRYAEQAKKKGIV

>TbraCSP6

MYAKLWILAITVYICHAAKQSKVYTDKYDKIDVDAILHNERVLKRYIDCLM  
DRARCTPDGAELKKYIPEALETECAKCTEAQKRFAKVMMSFLLQNKRNYWN  
ELLGKYDPNGKFRKKYEEAALQDEDEYSSFYNE

>TbraCSP7

MKASLLLLQVSIVLVAMVTWNMAAEGRSVSDALEAALKDKRYLARQLKC  
ALGEGACDPVGRRLKTYAPLVLRGACPKCTPSEVKQIQQVLAHIQRHYPKEW  
SKILKQYAGQ

>TbraCSP8

MLFRHHTLSAIVLFFSLNLA STLTLQQIHRSWFQRLSVIPVEDVLNNRRILNKY  
LGCLLRRTVCAPEARDFRILLPSILREPCNNCTERQRSSLKKIFEHVHTVHPGE  
WQEIMSMYDPKSEHQEKIINFISNS

>TbraCSP9

MKVITIVLICLSAFVVTIYAQYEVNVEEILNNKRLLDAYTKCYLDRGPCPGPAR  
ESKKKLGEVFTTNAKCNKKQRQDTRAAALRKLREKPKQLFLEIFEKYDAGSK  
HLDGFLIWLKKNND

>TbraCSP10

MKKMKLLKLVALLILSASISTAEEDNEFNRLFDPNVDVDAVLDNDRVLNAYL  
ACFYDEGPCAERPVLVSKIREVLETTGKCNDDQQRQLKYILNKFIDKRPND  
WQRILEIYDPDGAFRDNVEKLLKQGLPAQ

>TbraCSP11

MMLLSLCLAWLMFGMAFCRPDSEEDAFYYQVFEEIDVDIILDNERLLRSYLTC  
FFDEAPCSAHAAAVKESIPEVMSTVCGKCNDDKQKAIYKHALNKFIPTHKEDW  
DHILRIYDPNGEYWPNIKKFMES

>TbraCSP12

MKSAIIVFLLVICAGTNLASTYTTKYDNIDLDEILSNERIYVKYYNCLLNKSR  
CTPDGKELKENLPDALQTACDKCSEKQKQGSEKVLRFLEHRPQDYLALEEM  
YDPQKVYRHKYEKDAKERGLKFPD

>TbraCSP13

MMSATILAFSTIIAASFAASTYTTQYDNIDLDEILNNERVYIKYFNCLIGKDQCT  
PDGKELKETLPDALKTECKTEKQKAGAEKVLRFVIENRPDDYKQVEAIYD  
PEGIYRQKFGAEAKEKGIELPK

>TbraCSP14

MKCTVVFIVATFGAVICDEGTYTTKFDNIDLDEILKNERIYEKYLLCLKDEGK  
CTPDGRDLKDSLSDALQSGCEKCSEKQKAGTQKVLRFVLEKKPNDYLALEKI  
YDPNRIYRIKYKDEAEKLGLKFPNK

>TbraCSP15

MKCTVVFIIATIFGAVICDEGKYTTKYDNIDLDEILNNDRIYEKYFLCLKGEGK  
CTPDGRELKVALPDALKTRCVKCSEKQRAGTEKVLRFILDKKPNDYLVLEKIY  
DPDRMYRVMYKEDAEKLGLKFPTK

>TbraCSP16

MPLVFIGSIAAGEVYTSKYDNIDVDKILSNDRILSQYIKCLMDEGNCTNEGKEL  
KKTLPDALATGCNKCSEKQRAQTEKVLRHILKNRSRDWARLKGKYDPTGEY  
SKKYETKVPASK
